# Supplementary material
Source: ML conference proceedings conference paper supplement (https://openreview.net/forum?id=658hDy9RwC)
Supplement: supplementary_material [file attachment]

# Supplementary Material

In Section A, we discuss some potential negative societal impacts of our work. In Section B, we discuss some additional related work. In Section C, we give the definitions of some evaluation metrics. In Section D, we describe the baselines in detail. In Section E, we show the complete ASPEST algorithm and analyze its computational complexity. In Section F, we provide the details of the experimental setup. In Section G, we give some additional experimental results.

## A Potential Negative Societal Impacts

The proposed framework yields more reliable predictions with more optimized utilization of humans in the loop. One potential risk of such a system is that if the humans in the loop yield inaccurate or biased labels, our framework might cause them being absorbed by the predictor model and the selection prediction mechanism, and eventually the outcomes of the system might be inaccurate and biased. We leave the methods for inaccurate label or bias detection to future work.

## B More Related Work

**Distribution shift.** Distribution shift, where the training distribution differs from the test distribution, often occurs in practice and can substantially degrade the accuracy of the deployed DNNs [39, 70, 2]. Distribution shift can also substantially reduce the quality of uncertainty estimation [53], which is often used for rejecting examples in selective prediction and selecting samples for labeling in active learning. Several techniques try to tackle the challenge caused by distribution shift, including accuracy estimation [6, 8], error detection [30, 23], out-of-distribution detection [60], domain adaptation [18, 59], selective prediction [35] and active learning [37]. In our work, we combine selective prediction with active learning to address the issue of distribution shift.

**Deep ensembles.** Ensembles of DNNs (or deep ensembles) have been successfully used to boost predictive performance [49, 74]. Deep ensembles can also be used to improve the predictive uncertainty estimation [41, 14]. [41] shows that random initialization of the NN parameters along with random shuffling of the data points are sufficient for deep ensembles to perform well in practice. However, training multiple DNNs from random initialization can be very expensive. To obtain deep ensembles more efficiently, recent papers explore using checkpoints during training to construct the ensemble [67, 31], or fine-tuning a single pre-trained model to create the ensemble [38]. In our work, we use the checkpoints during fine-tuning a source-trained model via active learning as the ensemble and further boost the ensemble’s performance via self-training. We also use the ensemble’s uncertainty measured by a margin to select samples for labeling in active learning.

**Self-training.** Self-training is a common algorithmic paradigm for leveraging unlabeled data with DNNs. Self-training methods train a model to fit pseudo-labels (i.e., predictions on unlabeled data made by a previously-learned model) to boost the model’s performance [71, 22, 44, 68, 64]. In this work, we use self-training to improve selective prediction performance. Instead of using predicted labels as pseudo-labels as a common practice in prior works, we use the average softmax outputs of the checkpoints during training as the pseudo-labels and self-train the models in the ensemble on them with the KL-Divergence loss to improve selective prediction performance.

## C Evaluation Metrics

The introduced accuracy and coverage metrics in Section 3.2 depend on the threshold  $\tau$ . The following evaluation metrics are proposed to be agnostic to the threshold  $\tau$ :

**Maximum Accuracy at a Target Coverage.** Given a target coverage  $t_c$ , the maximum accuracy is defined as:

$$\max_{\tau} \quad acc(f_s, \tau), \quad s.t. \quad cov(f_s, \tau) \geq t_c \quad (12)$$

We denote this metric as  $acc|cov \geq t_c$ .

574 **Maximum Coverage at a Target Accuracy.** Given a target accuracy  $t_a$ , the maximum coverage is  
 575 defined as:

$$\max_{\tau} \quad cov(f_s, \tau), \quad s.t. \quad acc(f_s, \tau) \geq t_a \quad (13)$$

576 When  $\tau = \infty$ , we define  $cov(f_s, \tau) = 0$  and  $acc(f_s, \tau) = 1$ . We denote this metric as  $cov|_{acc \geq t_a}$ .

577 **Area Under the Accuracy-Coverage Curve (AUC).** We define the AUC metric as:

$$AUC(f_s) = \int_0^1 acc(f_s, \tau) dcov(f_s, \tau) \quad (14)$$

578 We use the composite trapezoidal rule to estimate the integration.

## 579 D Baselines

580 We consider two selective classification baselines Softmax Response (SR) [19] and Deep Ensembles  
 581 (DE) [41] and combine them with active learning techniques. We describe them in detail below.

### 582 D.1 Softmax Response

583 Suppose the neural network classifier is  $f$  where the last layer is a softmax. Let  $f(\mathbf{x} | k)$  be the soft  
 584 response output for the  $k$ -th class. Then the classifier is defined as  $f(\mathbf{x}) = \arg\max_{k \in \mathcal{Y}} f(\mathbf{x} | k)$   
 585 and the selection scoring function is defined as  $g(\mathbf{x}) = \max_{k \in \mathcal{Y}} f(\mathbf{x} | k)$ , which is also known  
 586 as the Maximum Softmax Probability (MSP) of the neural network. Recall that with  $f$  and  $g$ , the  
 587 selective classifier is defined in Eq (1). We use active learning to fine-tune the model  $f$  to improve  
 588 selective prediction performance of SR on the unlabeled test dataset  $U_X$ . The complete algorithm  
 589 is presented in Algorithm 1. In our experiments, we always set  $\lambda = 1$ . We use the joint training  
 590 objective (23) to avoid over-fitting to the small labeled test set  $\cup_{l=1}^t \tilde{B}_l$  and prevent the model from  
 591 forgetting the source training knowledge. The algorithm can be combined with different kinds of  
 592 acquisition functions. We describe the acquisition functions considered for SR below.

593 **Uniform.** In the  $t$ -th round of active learning, we select  $\lfloor \frac{M}{T} \rfloor$  data points as the batch  $B_t$   
 594 from  $U_X \setminus \cup_{l=0}^{t-1} B_l$  via uniform random sampling. The corresponding acquisition function is:  
 595  $a(B, f_{t-1}, g_{t-1}) = 1$ . When solving the objective (22), the tie is broken randomly.

596 **Confidence.** We define the confidence score of  $f$  on the input  $\mathbf{x}$  as

$$S_{\text{conf}}(\mathbf{x}; f) = \max_{k \in \mathcal{Y}} f(\mathbf{x} | k) \quad (15)$$

597 Then the acquisition function in the  $t$ -th round of active learning is defined as:

$$a(B, f_{t-1}, g_{t-1}) = - \sum_{\mathbf{x} \in B} S_{\text{conf}}(\mathbf{x}; f_{t-1}) \quad (16)$$

598 That is we select those test examples with the lowest confidence scores for labeling.

599 **Entropy.** We define the entropy score of  $f$  on the input  $\mathbf{x}$  as

$$S_{\text{entropy}}(\mathbf{x}; f) = \sum_{k \in \mathcal{Y}} -f(\mathbf{x} | k) \cdot \log f(\mathbf{x} | k) \quad (17)$$

600 Then the acquisition function in the  $t$ -th round of active learning is defined as:

$$a(B, f_{t-1}, g_{t-1}) = \sum_{\mathbf{x} \in B} S_{\text{entropy}}(\mathbf{x}; f_{t-1}) \quad (18)$$

601 That is we select those test examples with the highest entropy scores for labeling.

602 **Margin.** We define the margin score of  $f$  on the input  $\mathbf{x}$  as

$$S_{\text{margin}}(\mathbf{x}; f) = f(\mathbf{x} | \hat{y}) - \max_{k \in \mathcal{Y} \setminus \{\hat{y}\}} f(\mathbf{x} | k) \quad (19)$$

$$s.t. \quad \hat{y} = \arg\max_{k \in \mathcal{Y}} f(\mathbf{x} | k) \quad (20)$$

603 Then the acquisition function in the  $t$ -th round of active learning is defined as:

$$a(B, f_{t-1}, g_{t-1}) = - \sum_{\mathbf{x} \in B} S_{\text{margin}}(\mathbf{x}; f_{t-1}) \quad (21)$$

604 That is we select those test examples with lowest margin scores for labeling.

605 **kCG.** We use the k-Center-Greedy algorithm proposed in [61] to select test examples for labeling in  
606 each round.

607 **CLUE.** We use the Clustering Uncertainty-weighted Embeddings (CLUE) proposed in [56] to select  
608 test examples for labeling in each round. Following [56], we set the hyper-parameter  $T = 0.1$  on  
609 DomainNet and set  $T = 1.0$  on other datasets.

610 **BADGE.** We use the Diverse Gradient Embeddings (BADGE) proposed in [1] to select test examples  
611 for labeling in each round.

---

**Algorithm 1** Softmax Response with Active Learning

---

**Input:** A training dataset  $\mathcal{D}^{\text{tr}}$ , an unlabeled test dataset  $U_X$ , the number of rounds  $T$ , the labeling budget  $M$ , a source-trained model  $\bar{f}$ , an acquisition function  $a$  and a hyper-parameter  $\lambda$ .

Let  $f_0 = \bar{f}$ .

Let  $B_0 = \emptyset$ .

Let  $g_t(\mathbf{x}) = \max_{k \in \mathcal{Y}} f_t(\mathbf{x} | k)$ .

**for**  $t = 1, \dots, T$  **do**

    Select a batch  $B_t$  with a size of  $m = \lceil \frac{M}{T} \rceil$  from  $U_X$  for labeling via:

$$B_t = \arg \max_{B \subset U_X \setminus (\cup_{l=0}^{t-1} B_l), |B|=m} a(B, f_{t-1}, g_{t-1}) \quad (22)$$

    Use an oracle to assign ground-truth labels to the examples in  $B_t$  to get  $\tilde{B}_t$ .

    Fine-tune the model  $f_{t-1}$  using the following training objective:

$$\min_{\theta} \mathbb{E}_{(\mathbf{x}, y) \in \cup_{l=1}^t \tilde{B}_l} \ell_{CE}(\mathbf{x}, y; \theta) + \lambda \cdot \mathbb{E}_{(\mathbf{x}, y) \in \mathcal{D}^{\text{tr}}} \ell_{CE}(\mathbf{x}, y; \theta) \quad (23)$$

    where  $\theta$  is the model parameters of  $f_{t-1}$  and  $\ell_{CE}$  is the cross-entropy loss function.

    Let  $f_t = f_{t-1}$ .

**end for**

**Output:** The classifier  $f = f_T$  and the selection scoring function  $g = \max_{k \in \mathcal{Y}} f(\mathbf{x} | k)$ .

---

## 612 D.2 Deep Ensembles

613 It has been shown that deep ensembles can significantly improve selective prediction performance [41],  
614 not only because deep ensembles are more accurate than a single model, but also because deep  
615 ensembles yield more calibrated confidence.

616 Suppose the ensemble model  $f$  contains  $N$  models  $f^1, \dots, f^N$ . Let  $f^j(\mathbf{x} | k)$  denote the predicted  
617 probability of the model  $f^j$  on the  $k$ -th class. We define the predicted probability of the ensemble  
618 model  $f$  on the  $k$ -th class as:

$$f(\mathbf{x} | k) = \frac{1}{N} \sum_{j=1}^N f^j(\mathbf{x} | k). \quad (24)$$

619 The classifier is defined as  $f(\mathbf{x}) = \arg\max_{k \in \mathcal{Y}} f(\mathbf{x} | k)$  and the selection scoring function is defined  
620 as  $g(\mathbf{x}) = \max_{k \in \mathcal{Y}} f(\mathbf{x} | k)$ . We use active learning to fine-tune each model  $f^j$  in the ensemble to  
621 improve selective prediction performance of the ensemble on the unlabeled test dataset  $U_X$ . Each  
622 model  $f^j$  is first initialized by the source-trained model  $\bar{f}$ , and then fine-tuned independently via  
623 Stochastic Gradient Decent (SGD) with different sources of randomness (e.g., different random order  
624 of the training batches) on the training dataset  $\mathcal{D}^{\text{tr}}$  and the selected labeled test data. Note that this  
625 way to construct the ensembles is different from the standard Deep Ensembles method, which trains  
626 the models from different random initialization. We use this way to construct the ensemble due to  
627 the constraint in our problem setting, which requires us to fine-tune a given source-trained model

628  $\bar{f}$ . Training the models from different random initialization might lead to an ensemble with better  
 629 performance, but it is much more expensive, especially when the training dataset and the model are  
 630 large (e.g., training foundation models). Thus, the constraint in our problem setting is feasible in  
 631 practice. The complete algorithm is presented in Algorithm 2. In our experiments, we always set  
 632  $\lambda = 1$ ,  $N = 5$ , and  $n_s = 1000$ . We also use joint training here and the reasons are the same as  
 633 those for the Softmax Response baseline. The algorithm can be combined with different kinds of  
 634 acquisition functions. We describe the acquisition functions considered below.

635 **Uniform.** In the  $t$ -th round of active learning, we select  $\lfloor \frac{M}{T} \rfloor$  data points as the batch  $B_t$   
 636 from  $U_X \setminus \cup_{l=0}^{t-1} B_l$  via uniform random sampling. The corresponding acquisition function is:  
 637  $a(B, f_{t-1}, g_{t-1}) = 1$ . When solving the objective (31), the tie is broken randomly.

638 **Confidence.** The confidence scoring function  $S_{\text{conf}}$  for the ensemble model  $f$  is the same as that in  
 639 Eq. (15) ( $f(\mathbf{x} | k)$  for the ensemble model  $f$  is defined in Eq. (24)). The acquisition function in the  
 640  $t$ -th round of active learning is defined as:

$$a(B, f_{t-1}, g_{t-1}) = - \sum_{\mathbf{x} \in B} S_{\text{conf}}(\mathbf{x}; f_{t-1}) \quad (25)$$

641 That is we select those test examples with the lowest confidence scores for labeling.

642 **Entropy.** The entropy scoring function  $S_{\text{entropy}}$  for the ensemble model  $f$  is the same as that in  
 643 Eq. (17). The acquisition function in the  $t$ -th round of active learning is defined as:

$$a(B, f_{t-1}, g_{t-1}) = \sum_{\mathbf{x} \in B} S_{\text{entropy}}(\mathbf{x}; f_{t-1}), \quad (26)$$

644 That is we select those test examples with the highest entropy scores for labeling.

645 **Margin.** The margin scoring function  $S_{\text{margin}}$  for the ensemble model  $f$  is the same as that in Eq. (19).  
 646 The acquisition function in the  $t$ -th round of active learning is defined as:

$$a(B, f_{t-1}, g_{t-1}) = - \sum_{\mathbf{x} \in B} S_{\text{margin}}(\mathbf{x}; f_{t-1}) \quad (27)$$

647 That is we select those test examples with the lowest margin scores for labeling.

648 **Avg-KLD.** The Average Kullback-Leibler Divergence (Avg-KLD) is proposed in [48] as a disagree-  
 649 ment measure for the model ensembles, which can be used for sample selection in active learning.  
 650 The Avg-KLD score of the ensemble model  $f$  on the input  $\mathbf{x}$  is defined as:

$$S_{\text{kl}}(\mathbf{x}; f) = \frac{1}{N} \sum_{j=1}^N \sum_{k \in \mathcal{Y}} f^j(\mathbf{x} | k) \cdot \log \frac{f^j(\mathbf{x} | k)}{f(\mathbf{x} | k)}. \quad (28)$$

651 Then the acquisition function in the  $t$ -th round of active learning is defined as:

$$a(B, f_{t-1}, g_{t-1}) = \sum_{\mathbf{x} \in B} S_{\text{kl}}(\mathbf{x}; f_{t-1}), \quad (29)$$

652 That is we select those test examples with the highest Avg-KLD scores for labeling.

653 **CLUE.** CLUE [56] is proposed for a single model. Here, we adapt CLUE for the ensemble model,  
 654 which requires a redefinition of the entropy function  $\mathcal{H}(Y | \mathbf{x})$  and the embedding function  $\phi(\mathbf{x})$   
 655 used in the CLUE algorithm. We define the entropy function as Eq. (17) with the ensemble model  
 656  $f$ . Suppose  $\phi^j$  is the embedding function for the model  $f^j$  in the ensemble. Then, the embedding  
 657 of the ensemble model  $f$  on the input  $\mathbf{x}$  is  $[\phi^1(\mathbf{x}), \dots, \phi^N(\mathbf{x})]$ , which is the concatenation of the  
 658 embeddings of the models  $f^1, \dots, f^N$  on  $\mathbf{x}$ . Following [56], we set the hyper-parameter  $T = 0.1$  on  
 659 DomainNet and set  $T = 1.0$  on other datasets.

660 **BADGE.** BADGE [1] is proposed for a single model. Here, we adapt BADGE for the ensemble  
 661 model, which requires a redefinition of the gradient embedding  $g_x$  in the BADGE algorithm. Towards  
 662 this end, we propose the gradient embedding  $g_x$  of the ensemble model  $f$  as the concatenation of the  
 663 gradient embeddings of the models  $f^1, \dots, f^N$ .

---

**Algorithm 2** Deep Ensembles with Active Learning
 

---

**Input:** A training dataset  $\mathcal{D}^u$ , An unlabeled test dataset  $U_X$ , the number of rounds  $T$ , the total labeling budget  $M$ , a source-trained model  $\bar{f}$ , an acquisition function  $a(B, f, g)$ , the number of models in the ensemble  $N$ , the number of initial training steps  $n_s$ , and a hyper-parameter  $\lambda$ .

Let  $f_0^j = \bar{f}$  for  $j = 1, \dots, N$ .

Fine-tune each model  $f_0^j$  in the ensemble via SGD for  $n_s$  training steps independently using the following training objective with different randomness:

$$\min_{\theta^j} \mathbb{E}_{(\mathbf{x}, y) \in \mathcal{D}^u} \ell_{CE}(\mathbf{x}, y; \theta^j) \quad (30)$$

where  $\theta^j$  is the model parameters of  $f_0^j$  and  $\ell_{CE}$  is the cross-entropy loss function.

Let  $B_0 = \emptyset$ .

Let  $g_t(\mathbf{x}) = \max_{k \in \mathcal{Y}} f_t(\mathbf{x} | k)$ .

**for**  $t = 1, \dots, T$  **do**

    Select a batch  $B_t$  with a size of  $m = \lceil \frac{M}{T} \rceil$  from  $U_X$  for labeling via:

$$B_t = \arg \max_{B \subset U_X \setminus (\cup_{l=0}^{t-1} B_l), |B|=m} a(B, f_{t-1}, g_{t-1}) \quad (31)$$

    Use an oracle to assign ground-truth labels to the examples in  $B_t$  to get  $\tilde{B}_t$ .

    Fine-tune each model  $f_{t-1}^j$  in the ensemble via SGD independently using the following training objective with different randomness:

$$\min_{\theta^j} \mathbb{E}_{(\mathbf{x}, y) \in \cup_{l=1}^t \tilde{B}_l} \ell_{CE}(\mathbf{x}, y; \theta^j) + \lambda \cdot \mathbb{E}_{(\mathbf{x}, y) \in \mathcal{D}^u} \ell_{CE}(\mathbf{x}, y; \theta^j) \quad (32)$$

    where  $\theta^j$  is the model parameters of  $f_{t-1}^j$ .

    Let  $f_t^j = f_{t-1}^j$  for  $j = 1, \dots, N$ .

**end for**

**Output:** The classifier  $f = f_T$  and the selection scoring function  $g = \max_{k \in \mathcal{Y}} f(\mathbf{x} | k)$ .

---

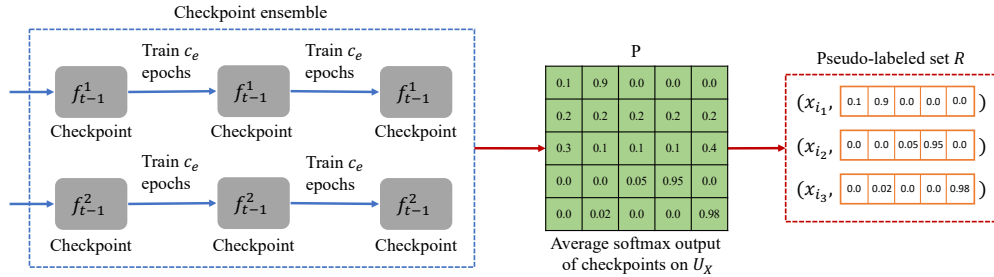

Figure 3: Illustration of the checkpoint ensemble and pseudo-labeled set construction in the proposed ASPEST.

## E ASPEST Algorithm and its Computational Complexity

Algorithm 3 presents the overall ASPEST method. Figure 3 illustrates how the checkpoint ensemble and the pseudo-labeled set are constructed in the proposed ASPEST. Next, we will analyze the computational complexity of ASPEST.

Let the complexity for one step of updating  $P$  and  $N_e$  be  $t_u$  (mainly one forward pass of DNN); for one DNN gradient update step is  $t_g$  (mainly one forward and backward pass of DNN); and for sample selection is  $t_s$  (mainly sorting test examples). Then, the total complexity of ASPEST would be  $O\left(N \cdot \frac{n_s}{c_s} \cdot t_u + N \cdot n_s \cdot t_g + T \cdot [t_s + N \cdot (e_f + e_s \cdot p) \cdot \frac{n}{b} \cdot t_g + N \cdot \frac{e_s + e_f}{c_e} \cdot t_u]\right)$ , where  $e_f$  is the number of fine-tuning epochs and  $e_s$  is the number of self-training epochs and  $b$  is the batch size. Although the training objectives include training on  $\mathcal{D}^u$ , the complexity doesn't depend on the size of  $\mathcal{D}^u$  since we measure  $e_f$  over  $\cup_{l=1}^t \tilde{B}_l$  in training objective (9) and measure  $e_s$  over  $R_{\text{sub}}$  in training objective (11). In practice, we usually have  $t_s \ll t_g$  and  $t_u \ll t_g$ . Also, we set  $e_s \cdot p < e_f$ ,

---

**Algorithm 3** Active Selective Prediction using Ensembles and Self-Training

---

**Input:** A training set  $\mathcal{D}^{tr}$ , a unlabeled test set  $U_X$ , the number of rounds  $T$ , the labeling budget  $M$ , the number of models  $N$ , the number of initial training steps  $n_s$ , the initial checkpoint steps  $c_s$ , a checkpoint epoch  $c_e$ , a threshold  $\eta$ , a sub-sampling fraction  $p$ , and a hyper-parameter  $\lambda$ .

Let  $f_0^j = \bar{f}$  for  $j = 1, \dots, N$ .

Set  $N_e = 0$  and  $P = \mathbf{0}_{n \times K}$ .

Fine-tune each  $f_0^j$  for  $n_s$  training steps using objective (7) and update  $P$  and  $N_e$  using Eq. (6) every  $c_s$  training steps.

**for**  $t = 1, \dots, T$  **do**

    Select a batch  $B_t$  from  $U_X$  for labeling using the sample selection objective (8).

    Use an oracle to assign ground-truth labels to the examples in  $B_t$  to get  $\tilde{B}_t$ .

    Set  $N_e = 0$  and  $P = \mathbf{0}_{n \times K}$ .

    Fine-tune each  $f_{t-1}^j$  using objective (9), while updating  $P$  and  $N_e$  using Eq (6) every  $c_e$  training epochs.

    Let  $f_t^j = f_{t-1}^j$ .

    Construct the pseudo-labeled set  $R$  via Eq (10) and create  $R_{\text{sub}}$  by randomly sampling up to  $[p \cdot n]$  data points from  $R$ .

    Train each  $f_t^j$  further via SGD using the objective (11) and update  $P$  and  $N_e$  using Eq (6) every  $c_e$  training epochs.

**end for**

**Output:** The classifier  $f(\mathbf{x}_i) = \text{argmax}_{k \in \mathcal{Y}} P_{i,k}$  and the selection scoring function  $g(\mathbf{x}_i) = \max_{k \in \mathcal{Y}} P_{i,k}$ .

---

676  $n_s \ll \frac{n}{b} \cdot T \cdot e_f$  and  $\frac{e_s + e_f}{c_e} \ll (e_f + e_s \cdot p) \cdot \frac{n}{b}$ . So the complexity of ASPEST is  $O\left(N \cdot T \cdot \frac{n}{b} \cdot e_f \cdot t_g\right)$ .  
677 Suppose the size of  $\mathcal{D}^u$  is  $n_{tr}$  and the number of source training epochs is  $e_p$ . Then, the complexity  
678 for source training is  $O\left(\frac{n_{tr}}{b} \cdot e_p \cdot t_g\right)$ . In practice, we usually have  $N \cdot T \cdot n \cdot e_f \ll n_{tr} \cdot e_p$ . Overall,  
679 the complexity of ASPEST would be much smaller than that of source training.

## 680 F Details of Experimental Setup

### 681 F.1 Computing Infrastructure and Runtime

682 We run all experiments with TensorFlow 2.0 on NVIDIA A100 GPUs in the Debian GNU/Linux 10  
683 system. We report the total runtime of the proposed method ASPEST on each dataset in Table 4. Note  
684 that in our implementation, we train models in the ensemble sequentially. However, it is possible to  
685 train models in the ensemble in parallel, which can significantly reduce the runtime. With the optimal  
686 implementation, the inference latency of the ensemble can be as low as the inference latency of a  
687 single model.

| Dataset           | Total Runtime  |
|-------------------|----------------|
| MNIST→SVHN        | 24 min         |
| CIFAR-10→CINIC-10 | 1 hour         |
| FMoW              | 2 hour 48 min  |
| Amazon Review     | 1 hour 34 min  |
| DomainNet (R→C)   | 2 hours 10 min |
| DomainNet (R→P)   | 1 hour 45 min  |
| DomainNet (R→S)   | 1 hour 51 min  |
| Otto              | 18 min         |

Table 4: The runtime of ASPEST when the labeling budget  $M = 500$ . We use the default hyper-parameters for ASPEST described in Section 5.1.

## 688 F.2 Datasets

689 We describe the datasets used below. For all image datasets, we normalize the range of pixel values  
690 to  $[0,1]$ .

691 **MNIST→SVHN.** The source training dataset  $\mathcal{D}^{\text{tr}}$  is MNIST [42] while the target test dataset  $U_X$  is  
692 SVHN [51]. MNIST consists  $28 \times 28$  grayscale images of handwritten digits, containing in total 5,500  
693 training images and 1,000 test images. We resize each image to be  $32 \times 32$  resolution and change  
694 them to be colored. We use the training set of MNIST as  $\mathcal{D}^{\text{tr}}$  and the test set of MNIST as the source  
695 validation dataset. SVHN consists  $32 \times 32$  colored images of digits obtained from house numbers in  
696 Google Street View images. The training set has 73,257 images and the test set has 26,032 images.  
697 We use the test set of SVHN as  $U_X$ .

698 **CIFAR-10→CINIC-10.** The source training dataset  $\mathcal{D}^{\text{tr}}$  is CIFAR-10 [40] while the target test  
699 dataset  $U_X$  is CINIC-10 [9]. CIFAR-10 consists  $32 \times 32$  colored images with ten classes (dogs, frogs,  
700 ships, trucks, etc.), each consisting of 5,000 training images and 1,000 test images. We use the  
701 training set of CIFAR-10 as  $\mathcal{D}^{\text{tr}}$  and the test set of CIFAR-10 as the source validation dataset. During  
702 training, we apply random horizontal flipping and random cropping with padding data augmentations  
703 to the training images. CINIC-10 is an extension of CIFAR-10 via the addition of downsampled  
704 ImageNet images. CINIC-10 has a total of 270,000 images equally split into training, validation, and  
705 test. In each subset (90,000 images) there are ten classes (identical to CIFAR-10 classes). There are  
706 9,000 images per class per subset. We use a subset of the CINIC-10 test set containing 30,000 images  
707 as  $U_X$ .

708 **FMoW.** We use the FMoW-WILDS dataset from [39]. FMoW-wilds is based on the Functional  
709 Map of the World dataset [7], which collected and categorized high-resolution satellite images from  
710 over 200 countries based on the functional purpose of the buildings or land in the image, over the  
711 years 2002–2018. The task is multi-class classification, where the input  $\mathbf{x}$  is an RGB satellite image,  
712 the label  $y$  is one of 62 building or land use categories, and the domain  $d$  represents both the year  
713 the image was taken as well as its geographical region (Africa, the Americas, Oceania, Asia, or  
714 Europe). The training set contains 76,863 images from the years 2002-2013. The In-Distribution  
715 (ID) validation set contains 11,483 images from the years 2002-2013. The OOD test set contains  
716 22,108 images from the years 2016-2018. We resize each image to be  $96 \times 96$  resolution to save  
717 computational cost. We use the training set as  $\mathcal{D}^{\text{tr}}$  and the ID validation set as the source validation  
718 dataset. During training, we apply random horizontal flipping and random cropping with padding  
719 data augmentations to the training images. We use the OOD test set as  $U_X$ .

720 **Amazon Review.** We use the Amazon Review WILDS dataset from [39]. The dataset comprises  
721 539,502 customer reviews on Amazon taken from the Amazon Reviews dataset [52]. The task  
722 is multi-class sentiment classification, where the input  $\mathbf{x}$  is the text of a review, the label  $y$  is a  
723 corresponding star rating from 1 to 5, and the domain  $d$  is the identifier of the reviewer who wrote  
724 the review. The training set contains 245,502 reviews from 1,252 reviewers. The In-Distribution  
725 (ID) validation set contains 46,950 reviews from 626 of the 1,252 reviewers in the training set. The  
726 Out-Of-Distribution (OOD) test set contains 100,050 reviews from another set of 1,334 reviewers,  
727 distinct from those of the training set. We use the training set as  $\mathcal{D}^{\text{tr}}$  and the ID validation set as the  
728 source validation dataset. We use a subset of the OOD test set containing 22,500 reviews from 300  
729 reviewers as  $U_X$ .

730 **DomainNet.** DomainNet [55] is a dataset of common objects in six different domains. All domains  
731 include 345 categories (classes) of objects such as Bracelet, plane, bird, and cello. We use five  
732 domains from DomainNet including: (1) Real: photos and real world images. The training set from  
733 the Real domain has 120,906 images while the test set has 52,041 images; (2) Clipart: a collection  
734 of clipart images. The training set from the Clipart domain has 33,525 images while the test set  
735 has 14,604 images; (3) Sketch: sketches of specific objects. The training set from the Sketch has  
736 48,212 images while the test set has 20,916 images; (4) Painting: artistic depictions of objects in  
737 the form of paintings. The training set from the Painting domain has 50,416 images while the test  
738 set has 21,850 images. (5) Infograph: infographic images with specific objects. The training set  
739 from the Infograph domain has 36,023 images while the test set has 15,582 images. We resize each  
740 image from all domains to be  $96 \times 96$  resolution to save computational cost. We use the training  
741 set from the Real domain as  $\mathcal{D}^{\text{tr}}$  and the test set from the Real domain as the source validation  
742 dataset. During training, we apply random horizontal flipping and random cropping with padding  
743 data augmentations to the training images. We use the test sets from three domains Clipart, Sketch,

and Painting as three different  $U_X$  for evaluation. So we evaluate three shifts: Real→Clipart (R→C), Real→Sketch (R→S), and Real→Painting (R→P). We use the remaining shift Real→Infograph (R→I) as a validation dataset for tuning the hyper-parameters.

**Otto.** The Otto Group Product Classification Challenge [4] is a tabular dataset hosted on Kaggle<sup>2</sup>. The task is to classify each product with 93 features into 9 categories. Each target category represents one of the most important product categories (like fashion, electronics, etc). It contains 61,878 training data points. Since it only provides labels for the training data, we need to create the training, validation and test set. To create a test set that is from a different distribution than the training set, we apply the Local Outlier Factor (LOF) [5], which is an unsupervised outlier detection method, on the Otto training data to identify a certain fraction (e.g., 0.2) of outliers as the test set. Specifically, we apply the *LocalOutlierFactor* function provided by scikit-learn [54] on the training data with a contamination of 0.2 (contamination value determines the proportion of outliers in the data set) to identify the outliers. We identify 12,376 outlier data points and use them as the test set  $U_X$ . We then randomly split the remaining data into a training set  $\mathcal{D}^{\text{tr}}$  with 43,314 data points and a source validation set with 6,188 data points. We show that the test set indeed has a distribution shift compared to the source validation set, which causes the model trained on the training set to have a drop in performance (see Table 5 in Appendix G.1).

### F.3 Details on Model Architectures and Training on Source Data

On all datasets, we use the following supervised training objective for training models on the source training set  $\mathcal{D}^{\text{tr}}$ :

$$\min_{\theta} \mathbb{E}_{(\mathbf{x}, y) \in \mathcal{D}^{\text{tr}}} \ell_{CE}(\mathbf{x}, y; \theta) \quad (33)$$

where  $\ell_{CE}$  is the cross-entropy loss and  $\theta$  is the model parameters.

On MNIST→SVHN, we use the Convolutional Neural Network (CNN) [43] consisting of four convolutional layers followed by two fully connected layers with batch normalization and dropout layers. We train the model on the training set of MNIST for 20 epochs using the Adam optimizer [36] with a learning rate of  $10^{-3}$  and a batch size of 128.

On CIFAR-10→CINIC-10, we use the ResNet-20 network [27]. We train the model on the training set of CIFAR-10 for 200 epochs using the SGD optimizer with a learning rate of 0.1, a momentum of 0.9, and a batch size of 128. The learning rate is multiplied by 0.1 at the 80, 120, and 160 epochs, respectively, and is multiplied by 0.5 at the 180 epoch.

On the FMoW dataset, we use the DensetNet-121 network [32] pre-trained on ImageNet. We train the model further for 50 epochs using the Adam optimizer with a learning rate of  $10^{-4}$  and a batch size of 128.

On the Amazon Review dataset, we use the pre-trained RoBERTa base model [46] to extract the embedding of the input sentence for classification (i.e., RoBERTa’s output for the [CLS] token) and then build an eight-layer fully connected neural network (also known as a multi-layer perceptron) with batch normalization, dropout layers and L2 regularization on top of the embedding. Note that we only update the parameters of the fully connected neural network without updating the parameters of the pre-trained RoBERTa base model during training (i.e., freeze the parameters of the RoBERTa base model during training). We train the model for 200 epochs using the Adam optimizer with a learning rate of  $10^{-3}$  and a batch size of 128.

On the DomainNet dataset, we use the ResNet-50 network [26] pre-trained on ImageNet. We train the model further on the training set from the Real domain for 50 epochs using the Adam optimizer with a learning rate of  $10^{-4}$  and a batch size of 128.

On the Otto dataset, we use a six-layer fully connected neural network (also known as a multi-layer perceptron) with batch normalization, dropout layers and L2 regularization. We train the model on the created training set for 200 epochs using the Adam optimizer with a learning rate of  $10^{-3}$  and a batch size of 128.

<sup>2</sup>URL: <https://kaggle.com/competitions/otto-group-product-classification-challenge>



#### F.4 Active learning hyper-parameters

During the active learning process, we fine-tune the model on the selected labeled test data. During fine-tuning, we don't apply any data augmentation to the test data. We use the same fine-tuning hyper-parameters for different methods to ensure a fair comparison. The optimizer used is the same as that in the source training stage (described in Appendix F.3). On MNIST→SVHN, we use a learning rate of  $10^{-3}$ ; On CIFAR-10→CINIC-10, we use a learning rate of  $5 \times 10^{-3}$ ; On FMoW, we use a learning rate of  $10^{-4}$ ; On Amazon Review, we use a learning rate of  $10^{-3}$ ; On DomainNet, we use a learning rate of  $10^{-4}$ ; On Otto, we use a learning rate of  $10^{-3}$ . On all datasets, we fine-tune the model for at least 50 epochs and up to 200 epochs with a batch size of 128 and early stopping using 10 patient epochs.

## G Additional Experimental Results

### G.1 Evaluate Source-Trained Models

In this section, we evaluate the accuracy of the source-trained models on the source validation dataset and the target test dataset  $U_X$ . The models are trained on the source training set  $\mathcal{D}^{\text{tr}}$  (refer to Appendix F.3 for the details of source training). The source validation data are randomly sampled from the training data distribution while the target test data are sampled from a different distribution than the training data distribution. The results in Table 5 show that the models trained on  $\mathcal{D}^{\text{tr}}$  always suffer a drop in accuracy when evaluating them on the target test dataset  $U_X$ .

| Dataset           | Source Accuracy | Target Accuracy |
|-------------------|-----------------|-----------------|
| MNIST→SVHN        | 99.40           | 24.68           |
| CIFAR-10→CINIC-10 | 90.46           | 71.05           |
| FMoW              | 46.25           | 38.01           |
| Amazon Review     | 65.39           | 61.40           |
| DomainNet (R→C)   | 63.45           | 33.37           |
| DomainNet (R→P)   | 63.45           | 26.29           |
| DomainNet (R→S)   | 63.45           | 16.00           |
| Otto              | 80.72           | 66.09           |

Table 5: Results of evaluating the accuracy of the source-trained models on the source validation dataset and the target test dataset  $U_X$ . All numbers are percentages.

### G.2 Evaluate Softmax Response with Various Active Learning Methods

To see whether combining existing selective prediction and active learning approaches could solve the active selective prediction problem, we evaluate the existing selective prediction method Softmax Response (SR) with active learning methods based on uncertainty or diversity. The results in Table 6 show that the methods based on uncertainty sampling (SR+Confidence, SR+Entropy and SR+Margin) achieve relatively high accuracy of  $f$ , but suffer from the overconfidence issue (i.e., mis-classification with high confidence). The method based on diversity sampling (SR+kCG) doesn't have the overconfidence issue, but suffers from low accuracy of  $f$ . Also, the hybrid methods based on uncertainty and diversity sampling (SR+CLUE and SR+BADGE) still suffer from the overconfidence issue. In contrast, the proposed method ASPEST achieves much higher accuracy of  $f$ , effectively alleviates the overconfidence issue, and significantly improves the selective prediction performance.

### G.3 Complete Evaluation Results

We give complete experimental results for the baselines and the proposed method ASPEST on all datasets in this section. We repeat each experiment three times with different random seeds and report the mean and standard deviation (std) values. These results are shown in Table 7 (MNIST→SVHN), Table 8 (CIFAR-10→CINIC-10), Table 9 (FMoW), Table 10 (Amazon Review), Table 11 (DomainNet R→C), Table 12 (DomainNet R→P), Table 13 (DomainNet R→S) and Table 14 (Otto). Our results show that the proposed method ASPEST consistently outperforms the baselines across different image, text and structured datasets.

| Method        | Accuracy of $f \uparrow$ | Overconfidence ratio $\downarrow$ | AUC $\uparrow$          |
|---------------|--------------------------|-----------------------------------|-------------------------|
| SR+Confidence | 45.29 $\pm$ 3.39         | 16.91 $\pm$ 2.24                  | 64.14 $\pm$ 2.83        |
| SR+Entropy    | 45.78 $\pm$ 6.36         | 36.84 $\pm$ 18.96                 | 65.88 $\pm$ 4.74        |
| SR+Margin     | 58.10 $\pm$ 0.55         | 13.18 $\pm$ 1.85                  | 76.79 $\pm$ 0.45        |
| SR+kCG        | 32.68 $\pm$ 3.87         | <b>0.04</b> $\pm$ 0.01            | 48.83 $\pm$ 7.21        |
| SR+CLUE       | 55.22 $\pm$ 2.27         | 9.47 $\pm$ 0.94                   | 73.15 $\pm$ 2.68        |
| SR+BADGE      | 56.55 $\pm$ 1.62         | 8.37 $\pm$ 2.56                   | 76.06 $\pm$ 1.63        |
| ASPEST (ours) | <b>71.82</b> $\pm$ 1.49  | 0.10 $\pm$ 0.02                   | <b>88.84</b> $\pm$ 1.02 |

Table 6: Evaluating the Softmax Response (SR) method with various active learning methods and the proposed ASPEST on MNIST $\rightarrow$ SVHN. The experimental setup is describe in Section 5.1. The labeling budget  $M$  is 100. The overconfidence ratio is the ratio of *mis-classified* unlabeled test inputs that have confidence  $\geq 1$  (the highest confidence). The mean and std of each metric over three random runs are reported (mean $\pm$ std). All numbers are percentages. **Bold** numbers are superior results.

| Dataset<br>Metric<br>Labeling Budget | MNIST $\rightarrow$ SVHN     |                        |                        |                              |                        |                        |                        |                        |                        |
|--------------------------------------|------------------------------|------------------------|------------------------|------------------------------|------------------------|------------------------|------------------------|------------------------|------------------------|
|                                      | $cov acc \geq 90\% \uparrow$ |                        |                        | $acc cov \geq 90\% \uparrow$ |                        |                        | AUC $\uparrow$         |                        |                        |
|                                      | 100                          | 500                    | 1000                   | 100                          | 500                    | 1000                   | 100                    | 500                    | 1000                   |
| SR+Uniform                           | 0.00 $\pm$ 0.0               | 51.46 $\pm$ 3.7        | 75.57 $\pm$ 0.9        | 58.03 $\pm$ 1.5              | 76.69 $\pm$ 1.2        | 84.39 $\pm$ 0.2        | 74.08 $\pm$ 1.5        | 88.80 $\pm$ 0.8        | 93.57 $\pm$ 0.2        |
| SR+Confidence                        | 0.00 $\pm$ 0.0               | 55.32 $\pm$ 5.1        | 82.22 $\pm$ 1.3        | 47.66 $\pm$ 3.4              | 79.02 $\pm$ 0.7        | 87.19 $\pm$ 0.4        | 64.14 $\pm$ 2.8        | 89.93 $\pm$ 0.6        | 94.62 $\pm$ 0.2        |
| SR+Entropy                           | 0.00 $\pm$ 0.0               | 0.00 $\pm$ 0.0         | 75.08 $\pm$ 2.4        | 47.93 $\pm$ 7.0              | 77.09 $\pm$ 1.0        | 84.81 $\pm$ 0.7        | 65.88 $\pm$ 4.7        | 88.19 $\pm$ 0.8        | 93.37 $\pm$ 0.5        |
| SR+Margin                            | 0.00 $\pm$ 0.0               | 63.60 $\pm$ 2.7        | 82.19 $\pm$ 0.3        | 61.39 $\pm$ 0.5              | 80.96 $\pm$ 0.9        | 86.97 $\pm$ 0.2        | 76.79 $\pm$ 0.5        | 91.24 $\pm$ 0.5        | 94.82 $\pm$ 0.1        |
| SR+kCG                               | 2.52 $\pm$ 1.3               | 23.04 $\pm$ 0.3        | 38.97 $\pm$ 2.6        | 34.57 $\pm$ 4.4              | 52.76 $\pm$ 1.1        | 64.34 $\pm$ 4.8        | 48.83 $\pm$ 7.2        | 73.65 $\pm$ 1.0        | 83.16 $\pm$ 2.0        |
| SR+CLUE                              | 0.00 $\pm$ 0.0               | 62.03 $\pm$ 2.4        | 81.29 $\pm$ 1.1        | 57.35 $\pm$ 1.9              | 79.55 $\pm$ 0.8        | 86.28 $\pm$ 0.5        | 72.72 $\pm$ 1.9        | 90.98 $\pm$ 0.5        | 94.99 $\pm$ 0.2        |
| SR+BADGE                             | 0.00 $\pm$ 0.0               | 62.55 $\pm$ 4.4        | 82.39 $\pm$ 2.8        | 59.82 $\pm$ 1.7              | 79.49 $\pm$ 1.6        | 86.96 $\pm$ 0.9        | 76.06 $\pm$ 1.6        | 91.09 $\pm$ 0.9        | 95.16 $\pm$ 0.6        |
| DE+Uniform                           | 24.71 $\pm$ 5.6              | 68.98 $\pm$ 1.6        | 83.67 $\pm$ 0.1        | 63.22 $\pm$ 1.7              | 81.67 $\pm$ 0.4        | 87.32 $\pm$ 0.1        | 79.36 $\pm$ 1.7        | 92.47 $\pm$ 0.2        | 95.48 $\pm$ 0.0        |
| DE+Entropy                           | 6.24 $\pm$ 8.8               | 63.30 $\pm$ 6.5        | 84.62 $\pm$ 1.5        | 56.61 $\pm$ 0.6              | 80.16 $\pm$ 2.0        | 88.05 $\pm$ 0.5        | 72.51 $\pm$ 1.5        | 91.21 $\pm$ 1.4        | 95.45 $\pm$ 0.5        |
| DE+Confidence                        | 14.92 $\pm$ 5.1              | 67.87 $\pm$ 1.4        | 89.41 $\pm$ 0.3        | 61.11 $\pm$ 2.9              | 81.80 $\pm$ 0.5        | 89.75 $\pm$ 0.1        | 75.85 $\pm$ 3.0        | 92.16 $\pm$ 0.2        | 96.19 $\pm$ 0.1        |
| DE+Margin                            | 21.59 $\pm$ 3.8              | 77.84 $\pm$ 2.8        | 92.75 $\pm$ 0.3        | 62.88 $\pm$ 1.2              | 85.11 $\pm$ 1.1        | 91.17 $\pm$ 0.1        | 78.59 $\pm$ 1.4        | 94.31 $\pm$ 0.6        | 97.00 $\pm$ 0.0        |
| DE+Avg-KLD                           | 10.98 $\pm$ 4.6              | 61.45 $\pm$ 3.4        | 88.06 $\pm$ 2.2        | 54.80 $\pm$ 1.6              | 78.21 $\pm$ 1.6        | 89.23 $\pm$ 0.9        | 71.67 $\pm$ 2.2        | 90.92 $\pm$ 0.8        | 96.23 $\pm$ 0.4        |
| DE+CLUE                              | 22.34 $\pm$ 1.4              | 69.23 $\pm$ 1.9        | 82.80 $\pm$ 1.0        | 59.47 $\pm$ 1.3              | 81.05 $\pm$ 0.9        | 86.78 $\pm$ 0.4        | 76.88 $\pm$ 1.0        | 92.70 $\pm$ 0.5        | 95.56 $\pm$ 0.2        |
| DE+BADGE                             | 22.02 $\pm$ 4.5              | 72.31 $\pm$ 1.2        | 88.23 $\pm$ 0.4        | 61.23 $\pm$ 1.9              | 82.69 $\pm$ 0.5        | 89.15 $\pm$ 0.2        | 77.65 $\pm$ 1.9        | 93.38 $\pm$ 0.2        | 96.51 $\pm$ 0.1        |
| ASPEST (ours)                        | <b>52.10</b> $\pm$ 4.0       | <b>89.22</b> $\pm$ 0.9 | <b>98.70</b> $\pm$ 0.4 | <b>76.10</b> $\pm$ 1.5       | <b>89.62</b> $\pm$ 0.4 | <b>93.92</b> $\pm$ 0.3 | <b>88.84</b> $\pm$ 1.0 | <b>96.62</b> $\pm$ 0.2 | <b>98.06</b> $\pm$ 0.1 |

Table 7: Results of comparing ASPEST to the baselines on MNIST $\rightarrow$ SVHN. The mean and std of each metric over three random runs are reported (mean $\pm$ std). All numbers are percentages. **Bold** numbers are superior results.

#### 828 G.4 Effect of combining selective prediction with active learning

829 Selective prediction without active learning corresponds to the case where the labeling budget  $M = 0$   
830 and the selected set  $B^* = \emptyset$ . To make fair comparisons with selective prediction methods without  
831 active learning, we define a new coverage metric:

$$cov^*(f_s, \tau) = \mathbb{E}_{\mathbf{x} \sim U_X} \mathbb{I}[g(\mathbf{x}) \geq \tau \wedge \mathbf{x} \notin B^*] \quad (34)$$

| Dataset<br>Metric<br>Labeling Budget | CIFAR-10 $\rightarrow$ CINIC-10 |                        |                        |                              |                        |                        |                        |                        |                        |
|--------------------------------------|---------------------------------|------------------------|------------------------|------------------------------|------------------------|------------------------|------------------------|------------------------|------------------------|
|                                      | $cov acc \geq 90\% \uparrow$    |                        |                        | $acc cov \geq 90\% \uparrow$ |                        |                        | AUC $\uparrow$         |                        |                        |
|                                      | 500                             | 1000                   | 2000                   | 500                          | 1000                   | 2000                   | 500                    | 1000                   | 2000                   |
| SR+Uniform                           | 57.43 $\pm$ 0.2                 | 57.15 $\pm$ 0.6        | 58.37 $\pm$ 0.7        | 75.67 $\pm$ 0.2              | 75.69 $\pm$ 0.1        | 76.11 $\pm$ 0.3        | 89.77 $\pm$ 0.0        | 89.81 $\pm$ 0.1        | 90.09 $\pm$ 0.2        |
| SR+Confidence                        | 57.96 $\pm$ 0.6                 | 57.05 $\pm$ 0.7        | 61.11 $\pm$ 1.1        | 76.49 $\pm$ 0.2              | 76.87 $\pm$ 0.2        | 78.77 $\pm$ 0.4        | 90.00 $\pm$ 0.2        | 89.92 $\pm$ 0.2        | 90.91 $\pm$ 0.3        |
| SR+Entropy                           | 57.78 $\pm$ 0.7                 | 57.07 $\pm$ 1.4        | 61.07 $\pm$ 0.4        | 76.57 $\pm$ 0.3              | 76.71 $\pm$ 0.5        | 78.85 $\pm$ 0.2        | 90.01 $\pm$ 0.2        | 89.94 $\pm$ 0.3        | 90.88 $\pm$ 0.0        |
| SR+Margin                            | 57.72 $\pm$ 0.8                 | 57.98 $\pm$ 0.7        | 61.71 $\pm$ 0.2        | 76.24 $\pm$ 0.2              | 76.90 $\pm$ 0.2        | 78.42 $\pm$ 0.2        | 89.95 $\pm$ 0.2        | 90.14 $\pm$ 0.1        | 91.02 $\pm$ 0.0        |
| SR+kCG                               | 57.90 $\pm$ 0.5                 | 57.81 $\pm$ 0.7        | 60.36 $\pm$ 0.3        | 75.59 $\pm$ 0.1              | 75.73 $\pm$ 0.2        | 76.68 $\pm$ 0.2        | 89.78 $\pm$ 0.1        | 89.79 $\pm$ 0.2        | 90.41 $\pm$ 0.2        |
| SR+CLUE                              | 57.29 $\pm$ 0.5                 | 58.89 $\pm$ 0.5        | 62.28 $\pm$ 0.2        | 75.74 $\pm$ 0.2              | 76.68 $\pm$ 0.3        | 78.10 $\pm$ 0.2        | 89.67 $\pm$ 0.2        | 90.15 $\pm$ 0.1        | 91.03 $\pm$ 0.1        |
| SR+BADGE                             | 58.58 $\pm$ 0.6                 | 58.63 $\pm$ 0.3        | 61.95 $\pm$ 0.4        | 76.33 $\pm$ 0.5              | 76.58 $\pm$ 0.1        | 78.26 $\pm$ 0.2        | 90.05 $\pm$ 0.2        | 90.16 $\pm$ 0.1        | 90.99 $\pm$ 0.0        |
| DE+Uniform                           | 58.06 $\pm$ 0.3                 | 58.72 $\pm$ 0.1        | 59.54 $\pm$ 0.3        | 76.65 $\pm$ 0.1              | 77.06 $\pm$ 0.2        | 77.46 $\pm$ 0.1        | 90.26 $\pm$ 0.1        | 90.45 $\pm$ 0.1        | 90.73 $\pm$ 0.1        |
| DE+Entropy                           | 58.91 $\pm$ 0.6                 | 60.96 $\pm$ 0.2        | 63.85 $\pm$ 0.2        | 77.66 $\pm$ 0.1              | 79.14 $\pm$ 0.1        | 80.82 $\pm$ 0.2        | 90.55 $\pm$ 0.1        | 91.16 $\pm$ 0.1        | 91.89 $\pm$ 0.0        |
| DE+Confidence                        | 58.53 $\pm$ 0.3                 | 61.03 $\pm$ 0.6        | 64.42 $\pm$ 0.2        | 77.73 $\pm$ 0.2              | 79.00 $\pm$ 0.1        | 80.87 $\pm$ 0.0        | 90.53 $\pm$ 0.0        | 91.11 $\pm$ 0.1        | 91.96 $\pm$ 0.0        |
| DE+Margin                            | 58.76 $\pm$ 0.5                 | 61.60 $\pm$ 0.5        | 64.92 $\pm$ 0.5        | 77.61 $\pm$ 0.2              | 78.91 $\pm$ 0.1        | 80.59 $\pm$ 0.1        | 90.56 $\pm$ 0.1        | 91.11 $\pm$ 0.1        | 91.98 $\pm$ 0.1        |
| DE+Avg-KLD                           | 59.99 $\pm$ 0.6                 | 62.05 $\pm$ 0.3        | 65.02 $\pm$ 0.5        | 77.84 $\pm$ 0.1              | 79.15 $\pm$ 0.0        | 81.04 $\pm$ 0.1        | 90.74 $\pm$ 0.1        | 91.30 $\pm$ 0.1        | 92.10 $\pm$ 0.1        |
| DE+CLUE                              | 59.27 $\pm$ 0.1                 | 61.16 $\pm$ 0.4        | 64.42 $\pm$ 0.0        | 77.19 $\pm$ 0.1              | 78.37 $\pm$ 0.2        | 79.44 $\pm$ 0.1        | 90.44 $\pm$ 0.1        | 91.03 $\pm$ 0.1        | 91.74 $\pm$ 0.0        |
| DE+BADGE                             | 59.37 $\pm$ 0.4                 | 61.61 $\pm$ 0.1        | 64.53 $\pm$ 0.4        | 77.13 $\pm$ 0.1              | 78.33 $\pm$ 0.2        | 79.44 $\pm$ 0.3        | 90.49 $\pm$ 0.1        | 91.12 $\pm$ 0.0        | 91.78 $\pm$ 0.1        |
| ASPEST (ours)                        | <b>60.38</b> $\pm$ 0.3          | <b>63.34</b> $\pm$ 0.2 | <b>66.81</b> $\pm$ 0.3 | <b>78.23</b> $\pm$ 0.1       | <b>79.49</b> $\pm$ 0.1 | <b>81.25</b> $\pm$ 0.1 | <b>90.95</b> $\pm$ 0.0 | <b>91.60</b> $\pm$ 0.0 | <b>92.33</b> $\pm$ 0.1 |

Table 8: Results of comparing ASPEST to the baselines on CIFAR-10 $\rightarrow$ CINIC-10. The mean and std of each metric over three random runs are reported (mean $\pm$ std). All numbers are percentages. **Bold** numbers are superior results.

| Dataset         | FMoW                         |                  |                  |                              |                  |                  |                  |                  |                  |
|-----------------|------------------------------|------------------|------------------|------------------------------|------------------|------------------|------------------|------------------|------------------|
| Metric          | $cov acc \geq 70\% \uparrow$ |                  |                  | $acc cov \geq 70\% \uparrow$ |                  |                  | AUC $\uparrow$   |                  |                  |
| Labeling Budget | 500                          | 1000             | 2000             | 500                          | 1000             | 2000             | 500              | 1000             | 2000             |
| SR+Uniform      | 38.50±0.7                    | 42.00±0.5        | 52.34±1.1        | 51.76±0.7                    | 54.27±0.2        | 60.31±0.7        | 65.75±0.4        | 67.67±0.3        | 72.73±0.3        |
| SR+Confidence   | 37.34±0.3                    | 42.28±1.2        | 53.72±0.7        | 52.24±0.1                    | 55.52±0.5        | 61.76±0.4        | 65.57±0.1        | 68.03±0.5        | 73.14±0.5        |
| SR+Entropy      | 37.42±0.3                    | 42.08±0.2        | 51.18±0.4        | 51.74±0.4                    | 54.94±0.2        | 60.62±0.2        | 65.31±0.2        | 68.00±0.1        | 71.99±0.2        |
| SR+Margin       | 38.40±1.4                    | 44.67±0.7        | 55.68±1.5        | 52.88±0.3                    | 56.66±0.4        | 62.98±0.7        | 66.11±0.6        | 69.12±0.4        | 73.86±0.5        |
| SR+kCG          | 36.50±0.8                    | 39.76±1.2        | 45.87±0.6        | 49.36±0.7                    | 51.45±0.5        | 55.47±0.1        | 64.34±0.5        | 66.21±0.6        | 69.63±0.2        |
| SR+CLUE         | 38.65±0.7                    | 44.50±1.8        | 54.71±0.5        | 52.23±0.4                    | 55.54±1.0        | 61.13±0.4        | 65.78±0.3        | 68.76±0.9        | 73.80±0.1        |
| SR+BADGE        | 40.47±1.5                    | 45.65±1.2        | 57.59±0.4        | 53.08±1.0                    | 56.63±0.3        | 63.57±0.2        | 66.74±0.8        | 69.43±0.6        | 74.76±0.2        |
| DE+Uniform      | 44.74±0.4                    | 51.57±1.1        | 61.92±0.4        | 56.39±0.5                    | 60.01±0.5        | 65.74±0.2        | 69.44±0.3        | 72.48±0.5        | 77.02±0.1        |
| DE+Entropy      | 43.76±0.3                    | 50.52±1.4        | 62.73±0.4        | 56.29±0.3                    | 60.31±0.3        | 66.53±0.2        | 69.02±0.1        | 72.10±0.5        | 76.65±0.2        |
| DE+Confidence   | 45.23±0.6                    | 50.11±0.9        | 64.29±0.3        | 57.18±0.4                    | 60.46±0.3        | 67.46±0.0        | 69.80±0.3        | 72.11±0.4        | 77.37±0.1        |
| DE+Margin       | 46.35±0.6                    | 54.79±1.3        | 69.70±0.8        | 57.84±0.3                    | 62.43±0.5        | 69.87±0.4        | 70.18±0.3        | 73.62±0.3        | 78.88±0.4        |
| DE+Avg-KLD      | 46.29±0.3                    | 53.63±0.8        | 68.18±0.9        | 57.75±0.4                    | 61.60±0.3        | 69.11±0.4        | 70.16±0.1        | 73.09±0.2        | 78.48±0.3        |
| DE+CLUE         | 45.22±0.2                    | 49.97±0.3        | 58.05±0.5        | 56.39±0.1                    | 59.05±0.1        | 63.23±0.4        | 69.53±0.0        | 71.95±0.1        | 75.72±0.3        |
| DE+BADGE        | 47.39±0.7                    | 53.83±0.7        | 66.45±0.8        | 57.71±0.4                    | 61.16±0.2        | 68.13±0.4        | 70.59±0.4        | 73.40±0.3        | 78.66±0.1        |
| ASPEST (ours)   | <b>53.05±0.4</b>             | <b>59.86±0.4</b> | <b>76.52±0.6</b> | <b>61.18±0.2</b>             | <b>65.18±0.2</b> | <b>72.86±0.3</b> | <b>71.12±0.2</b> | <b>74.25±0.2</b> | <b>79.93±0.1</b> |

Table 9: Results of comparing ASPEST to the baselines on FMoW. The mean and std of each metric over three random runs are reported (mean±std). All numbers are percentages. **Bold** numbers are superior results.

| Dataset         | Amazon Review                |                  |                  |                              |                  |                  |                  |                  |                  |
|-----------------|------------------------------|------------------|------------------|------------------------------|------------------|------------------|------------------|------------------|------------------|
| Metric          | $cov acc \geq 80\% \uparrow$ |                  |                  | $acc cov \geq 80\% \uparrow$ |                  |                  | AUC $\uparrow$   |                  |                  |
| Labeling Budget | 500                          | 1000             | 2000             | 500                          | 1000             | 2000             | 500              | 1000             | 2000             |
| SR+Uniform      | 13.71±11.3                   | 24.10±5.3        | 24.87±2.6        | 65.13±0.8                    | 66.33±0.6        | 66.26±0.3        | 72.71±1.5        | 73.64±0.7        | 73.53±0.7        |
| SR+Confidence   | 11.28±8.9                    | 17.96±4.0        | 33.19±1.4        | 65.15±0.7                    | 66.29±0.4        | 68.94±0.1        | 72.89±0.7        | 73.25±0.7        | 76.17±0.2        |
| SR+Entropy      | 5.55±7.8                     | 13.32±9.5        | 25.47±1.8        | 65.11±1.1                    | 66.56±0.7        | 67.31±0.7        | 71.96±1.6        | 72.53±1.1        | 74.19±0.5        |
| SR+Margin       | 14.48±10.9                   | 22.61±4.2        | 28.35±6.1        | 65.75±0.5                    | 66.31±0.4        | 68.15±0.4        | 73.25±1.0        | 73.65±0.5        | 75.17±0.8        |
| SR+kCG          | 20.02±11.0                   | 17.02±12.2       | 29.08±4.2        | 64.03±3.1                    | 66.17±0.5        | 66.63±1.0        | 72.34±3.2        | 74.35±0.7        | 74.49±1.0        |
| SR+CLUE         | 4.15±5.9                     | 25.15±4.9        | 31.88±2.1        | 66.17±0.4                    | 66.30±0.4        | 67.12±0.7        | 73.43±0.4        | 74.07±0.7        | 75.29±0.9        |
| SR+BADGE        | 22.58±0.4                    | 23.78±6.4        | 30.71±4.6        | 66.29±0.4                    | 66.31±0.6        | 68.58±0.7        | 73.80±0.6        | 74.00±1.0        | 75.76±0.8        |
| DE+Uniform      | 34.35±1.4                    | 33.15±1.1        | 36.55±1.8        | 68.13±0.4                    | 68.12±0.6        | 68.88±0.2        | 76.20±0.3        | 76.16±0.4        | 77.07±0.3        |
| DE+Entropy      | 31.74±1.4                    | 36.29±1.6        | 40.33±1.7        | 68.19±0.3                    | 69.44±0.2        | 71.27±0.3        | 75.98±0.4        | 77.10±0.3        | 78.53±0.3        |
| DE+Confidence   | 35.12±1.8                    | 34.48±1.4        | 40.46±0.5        | 69.07±0.3                    | 69.47±0.2        | 71.08±0.2        | 76.63±0.2        | 76.87±0.3        | 78.27±0.1        |
| DE+Margin       | 33.42±1.3                    | 35.03±1.3        | 41.20±0.4        | 68.45±0.3                    | 69.30±0.2        | 70.88±0.1        | 76.18±0.2        | 76.91±0.3        | 78.31±0.1        |
| DE+Avg-KLD      | 33.03±1.5                    | 38.55±3.2        | 41.75±1.8        | 68.63±0.3                    | 69.95±0.4        | 71.10±0.3        | 76.21±0.4        | 77.62±0.6        | 78.62±0.3        |
| DE+CLUE         | 33.92±3.0                    | 35.27±1.4        | 34.83±3.1        | 68.09±0.3                    | 68.07±0.3        | 68.40±0.6        | 76.27±0.6        | 76.65±0.3        | 76.69±0.7        |
| DE+BADGE        | 32.23±3.7                    | 36.18±1.5        | 40.58±3.3        | 68.34±0.4                    | 68.87±0.2        | 70.29±0.3        | 76.13±0.7        | 77.09±0.2        | 78.44±0.5        |
| ASPEST (ours)   | <b>38.44±0.7</b>             | <b>40.96±0.8</b> | <b>45.77±0.1</b> | <b>69.31±0.3</b>             | <b>70.17±0.2</b> | <b>71.60±0.2</b> | <b>77.69±0.1</b> | <b>78.35±0.2</b> | <b>79.51±0.2</b> |

Table 10: Results of comparing ASPEST to the baselines on Amazon Review. The mean and std of each metric over three random runs are reported (mean±std). All numbers are percentages. **Bold** numbers are superior results.

832 The range of  $cov^*(f_s, \tau)$  is  $[0, 1 - \frac{M}{n}]$ , where  $M = |B^*|$  and  $n = |U_X|$ . If we use a larger labeling  
833 budget  $M$  for active learning, then the upper bound of  $cov^*(f_s, \tau)$  will be smaller. Thus, in order to  
834 beat selective classification methods without active learning, active selective prediction methods need  
835 to use a small labeling budget to achieve significant accuracy and coverage improvement. We still  
836 use the accuracy metric defined in (4). We then define a new maximum accuracy at a target coverage  
837  $t_c$  as:

$$\max_{\tau} \quad acc(f_s, \tau), \quad s.t. \quad cov^*(f_s, \tau) \geq t_c \quad (35)$$

838 We denote this metric as  $acc|cov^* \geq t_c$ .

839 We define a new maximum coverage at a target accuracy  $t_a$  metric as:

$$\max_{\tau} \quad cov^*(f_s, \tau), \quad s.t. \quad acc(f_s, \tau) \geq t_a \quad (36)$$

840 We denote this metric as  $cov^*|acc \geq t_a$ .

841 The results under these new metrics are shown in Table 1 (MNIST→SVHN), Table 15 (CIFAR-  
842 10→CINIC-10 and Otto), Table 16 (FMoW and Amazon Review) and Table 17 (DomainNet). The  
843 results show that combining selective prediction with active learning can significantly improve the  
844 accuracy and coverage metrics, even with small labeling budgets.

## 845 G.5 Effect of joint training

846 In the problem setup, we assume that we have access to the training dataset  $\mathcal{D}^{\text{tr}}$  and can use joint  
847 training to improve selective prediction performance. In this section, we perform experiments to

| Dataset         | DomainNet R→C (easy)         |                  |                  |                              |                  |                  |                  |                  |                  |
|-----------------|------------------------------|------------------|------------------|------------------------------|------------------|------------------|------------------|------------------|------------------|
| Metric          | $cov acc \geq 80\% \uparrow$ |                  |                  | $acc cov \geq 80\% \uparrow$ |                  |                  | AUC $\uparrow$   |                  |                  |
| Labeling Budget | 500                          | 1000             | 2000             | 500                          | 1000             | 2000             | 500              | 1000             | 2000             |
| SR+Uniform      | 25.56±0.6                    | 27.68±0.8        | 29.86±0.0        | 43.63±0.4                    | 45.57±0.3        | 47.27±0.4        | 63.31±0.4        | 65.11±0.5        | 66.70±0.2        |
| SR+Confidence   | 25.96±0.2                    | 27.80±1.2        | 32.51±1.3        | 44.90±0.8                    | 47.26±0.4        | 52.04±0.8        | 64.20±0.6        | 65.88±0.6        | 69.70±0.7        |
| SR+Entropy      | 25.44±1.0                    | 27.79±0.4        | 33.51±1.1        | 44.46±0.7                    | 46.96±0.3        | 52.25±0.5        | 63.52±0.6        | 65.72±0.2        | 70.03±0.5        |
| SR+Margin       | 26.28±1.2                    | 27.77±1.0        | 32.92±0.4        | 45.24±1.0                    | 47.12±0.7        | 52.29±0.4        | 64.37±0.8        | 65.91±0.6        | 70.01±0.4        |
| SR+kCG          | 21.12±0.3                    | 21.79±0.4        | 23.43±0.5        | 39.19±0.1                    | 40.59±0.4        | 41.11±0.3        | 58.88±0.0        | 60.11±0.4        | 60.89±0.1        |
| SR+CLUE         | 27.17±0.8                    | 29.78±0.8        | 34.82±0.6        | 44.57±0.7                    | 46.79±0.1        | 49.70±0.3        | 64.38±0.6        | 66.47±0.3        | 69.59±0.1        |
| SR+BADGE        | 27.78±0.8                    | 30.78±0.6        | 36.00±0.6        | 45.36±0.6                    | 48.43±0.6        | 53.00±0.4        | 64.90±0.5        | 67.56±0.4        | 71.39±0.4        |
| DE+Uniform      | 30.82±0.8                    | 33.05±0.4        | 36.80±0.2        | 48.19±0.3                    | 50.09±0.3        | 52.98±0.5        | 67.60±0.4        | 69.31±0.3        | 71.64±0.4        |
| DE+Entropy      | 29.13±0.9                    | 34.07±0.3        | 40.82±0.3        | 48.67±0.4                    | 51.66±0.2        | 57.81±0.2        | 67.48±0.3        | 70.05±0.2        | 74.64±0.2        |
| DE+Confidence   | 29.90±0.8                    | 33.73±0.2        | 40.80±0.2        | 48.60±0.3                    | 52.03±0.3        | 58.43±0.1        | 67.45±0.3        | 70.19±0.2        | 74.80±0.1        |
| DE+Margin       | 31.82±1.3                    | 35.68±0.2        | 43.39±0.7        | 50.12±0.4                    | 53.19±0.4        | 59.17±0.2        | 68.85±0.4        | 71.29±0.3        | 75.79±0.3        |
| DE+Avg-KLD      | 32.23±0.2                    | 36.09±0.6        | 44.00±0.5        | 49.81±0.3                    | 53.38±0.3        | 58.93±0.1        | 68.73±0.2        | 71.40±0.2        | 75.73±0.2        |
| DE+CLUE         | 30.80±0.3                    | 33.04±0.4        | 35.52±0.2        | 48.56±0.3                    | 49.91±0.3        | 51.40±0.2        | 67.82±0.2        | 69.10±0.2        | 70.62±0.2        |
| DE+BADGE        | 30.16±1.3                    | 36.18±0.3        | 43.34±0.3        | 49.78±0.3                    | 53.26±0.1        | 58.65±0.4        | 68.46±0.3        | 71.35±0.2        | 75.37±0.3        |
| ASPEST (ours)   | <b>37.38±0.1</b>             | <b>39.98±0.3</b> | <b>48.29±1.0</b> | <b>54.56±0.3</b>             | <b>56.95±0.1</b> | <b>62.69±0.2</b> | <b>71.61±0.2</b> | <b>73.27±0.2</b> | <b>77.40±0.4</b> |

Table 11: Results of comparing ASPEST to the baselines on DomainNet R→C. The mean and std of each metric over three random runs are reported (mean±std). All numbers are percentages. **Bold** numbers are superior results.

| Dataset         | DomainNet R→P (medium)       |                  |                  |                              |                  |                  |                  |                  |                  |
|-----------------|------------------------------|------------------|------------------|------------------------------|------------------|------------------|------------------|------------------|------------------|
| Metric          | $cov acc \geq 70\% \uparrow$ |                  |                  | $acc cov \geq 70\% \uparrow$ |                  |                  | AUC $\uparrow$   |                  |                  |
| Labeling Budget | 500                          | 1000             | 2000             | 500                          | 1000             | 2000             | 500              | 1000             | 2000             |
| SR+Uniform      | 21.01±1.0                    | 21.35±0.3        | 22.64±0.5        | 36.78±0.6                    | 37.18±0.2        | 38.20±0.4        | 51.87±0.7        | 52.31±0.0        | 53.34±0.4        |
| SR+Confidence   | 20.64±0.6                    | 22.15±0.8        | 23.60±0.6        | 37.01±0.3                    | 38.46±0.7        | 40.23±0.4        | 51.77±0.3        | 53.33±0.8        | 54.80±0.5        |
| SR+Entropy      | 20.76±0.7                    | 22.11±0.3        | 23.56±0.3        | 37.09±0.2                    | 38.38±0.3        | 40.30±0.1        | 51.86±0.4        | 53.29±0.3        | 54.81±0.2        |
| SR+Margin       | 21.43±0.4                    | 23.29±0.3        | 24.70±1.0        | 37.21±0.2                    | 39.15±0.4        | 40.81±0.4        | 52.33±0.1        | 54.09±0.3        | 55.70±0.4        |
| SR+kCG          | 17.33±0.4                    | 17.62±0.2        | 18.49±0.2        | 33.97±0.3                    | 34.12±0.1        | 34.36±0.1        | 48.61±0.5        | 48.65±0.2        | 49.25±0.2        |
| SR+CLUE         | 21.15±0.6                    | 22.49±0.5        | 24.84±0.7        | 36.96±0.2                    | 37.93±0.5        | 39.31±0.4        | 51.97±0.4        | 53.20±0.5        | 54.84±0.5        |
| SR+BADGE        | 20.07±0.3                    | 22.21±0.5        | 24.92±0.2        | 36.10±0.1                    | 38.11±0.4        | 40.40±0.5        | 50.99±0.0        | 53.10±0.4        | 55.40±0.4        |
| DE+Uniform      | 25.42±0.2                    | 26.38±0.2        | 28.83±0.3        | 40.83±0.1                    | 41.66±0.2        | 43.93±0.2        | 55.86±0.1        | 56.62±0.1        | 58.80±0.2        |
| DE+Entropy      | 25.74±0.4                    | 27.11±0.4        | 30.39±0.1        | 41.34±0.1                    | 42.92±0.3        | 45.92±0.3        | 56.06±0.2        | 57.51±0.3        | 60.10±0.2        |
| DE+Confidence   | 25.69±0.4                    | 27.38±0.7        | 30.47±0.1        | 41.45±0.2                    | 43.12±0.3        | 45.88±0.1        | 56.13±0.2        | 57.68±0.3        | 60.20±0.2        |
| DE+Margin       | 25.78±0.3                    | 27.88±0.5        | 31.03±0.4        | 41.26±0.2                    | 43.13±0.3        | 46.23±0.4        | 56.23±0.2        | 57.90±0.3        | 60.49±0.3        |
| DE+Avg-KLD      | 26.30±0.7                    | 28.00±0.1        | 31.97±0.2        | 41.80±0.3                    | 43.17±0.1        | 46.32±0.2        | 56.65±0.3        | 57.99±0.1        | 60.82±0.2        |
| DE+CLUE         | 25.38±0.6                    | 26.65±0.4        | 27.89±0.1        | 40.86±0.3                    | 41.62±0.2        | 42.46±0.1        | 55.79±0.4        | 56.65±0.2        | 57.71±0.1        |
| DE+BADGE        | 26.27±0.7                    | 27.69±0.1        | 31.84±0.2        | 42.02±0.6                    | 43.41±0.2        | 46.37±0.1        | 56.67±0.5        | 58.03±0.1        | 60.84±0.1        |
| ASPEST (ours)   | <b>29.69±0.1</b>             | <b>32.50±0.3</b> | <b>35.46±0.6</b> | <b>44.96±0.1</b>             | <b>46.77±0.2</b> | <b>49.42±0.1</b> | <b>58.74±0.0</b> | <b>60.36±0.0</b> | <b>62.84±0.2</b> |

Table 12: Results of comparing ASPEST to the baselines on DomainNet R→P. The mean and std of each metric over three random runs are reported (mean±std). All numbers are percentages. **Bold** numbers are superior results.

study the effect of joint training and the effect of the loss coefficient  $\lambda$  when performing joint training. We consider three active selective prediction methods: SR+margin (Algorithm 1 with margin sampling), DE+margin (Algorithm 2 with margin sampling), and ASPEST (Algorithm 3). We consider  $\lambda \in \{0, 0.5, 1.0, 2.0\}$ . When  $\lambda = 0$ , we don't use joint training; when  $\lambda > 0$ , we use joint training. The results are shown in Table 18. From the results, we can see that using joint training (i.e., when  $\lambda > 0$ ) can improve performance, especially when the labeling budget is small. Also, setting a too large value for  $\lambda$  (e.g.,  $\lambda = 2$ ) will lead to worse performance. Setting  $\lambda = 0.5$  or 1 usually leads to better performance. In our experiments, we simply set  $\lambda = 1$  by default.

## G.6 Effect of the number of rounds $T$

In this section, we study the effect of the number of rounds  $T$  in active learning. The results in Table 19 show that larger  $T$  usually leads to better performance, and the proposed method ASPEST has more improvement as we increase  $T$  compared to SR+Margin and DE+Margin. Also, when  $T$  is large enough, the improvement becomes minor (or can even be worse). Considering that in practice, we might not be able to set a large  $T$  due to resource constraints, we thus set  $T = 10$  by default.

## G.7 Effect of the number of models $N$ in the ensemble

In this section, we study the effect of the number of models  $N$  in the ensemble for DE+Margin and ASPEST. The results in Table 20 show that larger  $N$  usually leads to better results. However, larger  $N$  also means a larger computational cost. In our experiments, we simply set  $N = 5$  by default.

| Dataset         | DomainNet R→S (hard)         |                  |                  |                              |                  |                  |                  |                  |                  |
|-----------------|------------------------------|------------------|------------------|------------------------------|------------------|------------------|------------------|------------------|------------------|
| Metric          | $cov acc \geq 70\% \uparrow$ |                  |                  | $acc cov \geq 70\% \uparrow$ |                  |                  | AUC $\uparrow$   |                  |                  |
| Labeling Budget | 500                          | 1000             | 2000             | 500                          | 1000             | 2000             | 500              | 1000             | 2000             |
| SR+Uniform      | 12.12±0.7                    | 12.42±0.4        | 15.88±0.2        | 27.01±0.6                    | 27.74±0.3        | 31.29±0.3        | 41.12±0.8        | 41.89±0.2        | 46.17±0.3        |
| SR+Confidence   | 11.06±1.1                    | 11.48±0.5        | 14.49±1.5        | 26.53±1.4                    | 27.98±0.2        | 31.31±0.7        | 40.26±1.6        | 41.65±0.2        | 45.46±1.1        |
| SR+Entropy      | 10.91±0.3                    | 12.45±0.6        | 14.65±0.6        | 26.84±0.5                    | 28.72±0.5        | 31.07±0.6        | 40.47±0.6        | 42.61±0.8        | 45.31±0.4        |
| SR+Margin       | 12.23±0.4                    | 13.06±0.4        | 15.31±0.4        | 27.87±0.2                    | 29.19±0.4        | 31.51±0.8        | 41.91±0.3        | 43.22±0.4        | 45.97±0.8        |
| SR+kCG          | 9.03±0.2                     | 9.76±0.2         | 11.41±0.2        | 23.32±0.4                    | 24.06±0.4        | 25.68±0.4        | 36.63±0.3        | 37.57±0.4        | 39.80±0.3        |
| SR+CLUE         | 12.39±0.3                    | 14.17±1.0        | 15.80±0.8        | 27.82±0.4                    | 29.68±0.4        | 30.62±0.8        | 42.00±0.4        | 44.19±0.7        | 45.58±0.9        |
| SR+BADGE        | 12.18±0.9                    | 13.13±1.0        | 15.83±0.7        | 27.68±1.0                    | 28.96±0.7        | 32.00±0.4        | 41.72±1.1        | 43.28±0.9        | 46.60±0.6        |
| DE+Uniform      | 15.91±0.5                    | 17.55±0.4        | 21.33±0.3        | 31.37±0.5                    | 32.57±0.4        | 36.12±0.2        | 46.28±0.5        | 47.79±0.4        | 51.64±0.2        |
| DE+Entropy      | 13.70±0.3                    | 16.31±0.5        | 19.58±0.4        | 30.38±0.4                    | 32.45±0.2        | 36.18±0.2        | 44.79±0.5        | 47.15±0.2        | 50.87±0.3        |
| DE+Confidence   | 13.73±0.2                    | 16.21±0.2        | 19.22±0.4        | 30.55±0.3                    | 33.02±0.1        | 36.29±0.5        | 45.05±0.3        | 47.59±0.0        | 50.84±0.4        |
| DE+Margin       | 14.99±0.2                    | 17.45±0.4        | 21.74±0.7        | 31.67±0.5                    | 33.51±0.5        | 37.88±0.3        | 46.38±0.5        | 48.44±0.5        | 52.78±0.4        |
| DE+Avg-KLD      | 15.75±0.5                    | 18.14±0.7        | 22.15±0.3        | 31.36±0.2                    | 33.79±0.2        | 37.96±0.2        | 46.29±0.1        | 48.77±0.2        | 53.02±0.3        |
| DE+CLUE         | 14.76±0.5                    | 17.38±0.1        | 19.75±0.4        | 31.05±0.4                    | 32.58±0.2        | 34.61±0.4        | 45.80±0.3        | 47.74±0.1        | 50.09±0.2        |
| DE+BADGE        | 14.97±0.1                    | 17.49±0.3        | 21.71±0.3        | 31.35±0.2                    | 33.46±0.1        | 37.35±0.3        | 46.03±0.1        | 48.31±0.1        | 52.33±0.2        |
| ASPEST (ours)   | <b>17.86±0.4</b>             | <b>20.42±0.4</b> | <b>25.87±0.4</b> | <b>35.17±0.1</b>             | <b>37.28±0.3</b> | <b>41.46±0.2</b> | <b>49.62±0.1</b> | <b>51.61±0.4</b> | <b>55.90±0.2</b> |

Table 13: Results of comparing ASPEST to the baselines on DomainNet R→S. The mean and std of each metric over three random runs are reported (mean±std). All numbers are percentages. **Bold** numbers are superior results.

| Dataset         | Otto                         |                  |                  |                              |                  |                  |                  |                  |                  |
|-----------------|------------------------------|------------------|------------------|------------------------------|------------------|------------------|------------------|------------------|------------------|
| Metric          | $cov acc \geq 80\% \uparrow$ |                  |                  | $acc cov \geq 80\% \uparrow$ |                  |                  | AUC $\uparrow$   |                  |                  |
| Labeling Budget | 500                          | 1000             | 2000             | 500                          | 1000             | 2000             | 500              | 1000             | 2000             |
| SR+Uniform      | 63.58±0.7                    | 64.06±0.4        | 67.49±0.9        | 73.56±0.3                    | 73.57±0.6        | 75.21±0.2        | 84.46±0.2        | 84.61±0.3        | 85.72±0.2        |
| SR+Confidence   | 69.63±1.7                    | 73.41±0.6        | 84.19±0.5        | 75.96±0.5                    | 77.57±0.2        | 81.39±0.2        | 85.91±0.3        | 86.86±0.1        | 88.93±0.1        |
| SR+Entropy      | 67.79±0.8                    | 73.83±1.0        | 83.12±0.7        | 75.43±0.4                    | 77.91±0.3        | 81.07±0.2        | 85.41±0.3        | 86.94±0.2        | 88.86±0.1        |
| SR+Margin       | 68.10±0.1                    | 74.10±0.4        | 82.53±0.2        | 75.52±0.0                    | 77.66±0.1        | 80.93±0.1        | 85.56±0.1        | 86.99±0.1        | 88.83±0.1        |
| SR+kCG          | 64.84±0.7                    | 62.90±1.1        | 59.85±1.0        | 73.75±0.3                    | 73.03±0.2        | 71.90±0.3        | 85.08±0.2        | 84.67±0.2        | 83.79±0.3        |
| SR+CLUE         | 68.21±1.2                    | 70.85±0.6        | 78.26±0.9        | 75.26±0.5                    | 76.32±0.2        | 79.30±0.3        | 85.82±0.3        | 86.69±0.2        | 88.53±0.2        |
| SR+BADGE        | 67.23±1.0                    | 73.52±0.2        | 83.17±0.4        | 74.74±0.3                    | 77.43±0.2        | 81.20±0.2        | 85.41±0.3        | 87.10±0.2        | 89.25±0.1        |
| DE+Uniform      | 70.74±0.5                    | 72.20±0.6        | 75.58±0.5        | 76.40±0.1                    | 77.06±0.2        | 78.35±0.2        | 86.78±0.1        | 87.26±0.1        | 88.11±0.1        |
| DE+Entropy      | 75.71±0.3                    | 80.91±0.2        | 92.62±0.2        | 78.44±0.1                    | 80.29±0.1        | 84.05±0.1        | 87.87±0.1        | 88.77±0.1        | 90.99±0.1        |
| DE+Confidence   | 75.52±0.2                    | 81.69±0.7        | 92.15±0.9        | 78.28±0.1                    | 80.49±0.2        | 83.83±0.1        | 87.84±0.1        | 89.05±0.1        | 90.98±0.1        |
| DE+Margin       | 75.49±0.8                    | 81.36±0.8        | 92.49±0.4        | 78.41±0.3                    | 80.50±0.2        | 84.06±0.2        | 87.89±0.2        | 89.10±0.2        | 90.95±0.2        |
| DE+Avg-KLD      | 75.91±0.2                    | 80.97±0.5        | 91.94±0.8        | 78.50±0.1                    | 80.33±0.2        | 83.80±0.2        | 87.89±0.0        | 89.06±0.1        | 90.98±0.1        |
| DE+CLUE         | 69.66±0.5                    | 70.52±0.1        | 70.17±0.4        | 76.09±0.3                    | 76.32±0.1        | 76.31±0.2        | 86.67±0.1        | 87.11±0.0        | 87.06±0.1        |
| DE+BADGE        | 73.23±0.2                    | 77.89±0.6        | 86.32±0.5        | 77.33±0.1                    | 79.21±0.3        | 82.32±0.2        | 87.55±0.1        | 88.75±0.1        | 90.58±0.0        |
| ASPEST (ours)   | <b>77.85±0.2</b>             | <b>84.20±0.6</b> | <b>94.26±0.6</b> | <b>79.28±0.1</b>             | <b>81.40±0.1</b> | <b>84.62±0.1</b> | <b>88.28±0.1</b> | <b>89.61±0.1</b> | <b>91.49±0.0</b> |

Table 14: Results of comparing ASPEST to the baselines on Otto. The mean and std of each metric over three random runs are reported (mean±std). All numbers are percentages. **Bold** numbers are superior results.

## 866 G.8 Effect of the upper bound in pseudo-labeled set construction

867 When constructing the pseudo-labeled set  $R$  using Eq. (10), we exclude those test data points with  
868 confidence equal to 1. In this section, we study whether setting such an upper bound can improve  
869 performance. The results in Table 21 show that when the labeling budget is small, setting such an  
870 upper bound can improve performance significantly. However, when the labeling budget is large,  
871 setting such an upper bound may not improve the performance. Since we focus on the low labeling  
872 budget region, we decide to set such an upper bound for the proposed ASPEST method.

| Dataset                  | CIFAR-10→CINIC-10              |                                | Otto                           |                                |
|--------------------------|--------------------------------|--------------------------------|--------------------------------|--------------------------------|
| Metric                   | $cov^* acc \geq 90\% \uparrow$ | $acc cov^* \geq 90\% \uparrow$ | $cov^* acc \geq 80\% \uparrow$ | $acc cov^* \geq 80\% \uparrow$ |
| SR (w/o active learning) | 57.43±0.0                      | 75.62±0.0                      | 62.90±0.0                      | 73.13±0.0                      |
| SR+Margin (M=500)        | 56.76±0.8                      | 75.61±0.2                      | 65.34±0.1                      | 74.25±0.1                      |
| SR+Margin (M=1000)       | 56.04±0.7                      | 75.70±0.1                      | 68.11±0.4                      | 74.99±0.2                      |
| DE (w/o active learning) | 56.64±0.2                      | 75.83±0.1                      | 67.69±0.4                      | 75.41±0.2                      |
| DE+Margin (M=500)        | 57.78±0.5                      | 76.96±0.2                      | 72.44±0.7                      | 77.18±0.3                      |
| DE+Margin (M=1000)       | 59.55±0.5                      | 77.59±0.1                      | 74.78±0.7                      | 78.19±0.2                      |
| ASPEST (M=500)           | 59.37±0.3                      | 77.60±0.1                      | 74.71±0.2                      | 77.99±0.2                      |
| ASPEST (M=1000)          | <b>61.23±0.2</b>               | <b>78.16±0.1</b>               | <b>77.40±0.5</b>               | <b>79.05±0.2</b>               |

Table 15: Results on CIFAR-10→CINIC-10 and Otto for studying the effect of combining selective prediction with active learning. “w/o” means “without”. The mean and std of each metric over three random runs are reported (mean±std). All numbers are percentages. **Bold** numbers are superior results.

| Dataset<br>Metric        | FMoW                             |                                  | Amazon Review                    |                                  |
|--------------------------|----------------------------------|----------------------------------|----------------------------------|----------------------------------|
|                          | $cov^*   acc \geq 70\% \uparrow$ | $acc   cov^* \geq 70\% \uparrow$ | $cov^*   acc \geq 80\% \uparrow$ | $acc   cov^* \geq 80\% \uparrow$ |
| SR (w/o active learning) | 32.39±0.0                        | 48.15±0.0                        | 26.79±0.0                        | 65.64±0.0                        |
| SR+Margin (M=500)        | 37.54±1.3                        | 52.19±0.3                        | 14.16±10.6                       | 65.38±0.4                        |
| SR+Margin (M=1000)       | 42.65±0.7                        | 55.30±0.5                        | 21.60±4.0                        | 65.68±0.4                        |
| DE (w/o active learning) | 37.58±0.3                        | 52.01±0.1                        | 35.81±1.9                        | 68.41±0.2                        |
| DE+Margin (M=500)        | 45.30±0.6                        | 57.09±0.3                        | 32.68±1.2                        | 68.10±0.3                        |
| DE+Margin (M=1000)       | 52.32±1.2                        | 60.96±0.4                        | 33.47±1.2                        | 68.54±0.2                        |
| ASPEST (M=500)           | 51.85±0.4                        | 60.43±0.2                        | 37.59±0.6                        | 68.91±0.2                        |
| ASPEST (M=1000)          | <b>57.15±0.4</b>                 | <b>63.71±0.2</b>                 | <b>39.14±0.8</b>                 | <b>69.31±0.2</b>                 |

Table 16: Results on FMoW and Amazon Review for studying the effect of combining selective prediction with active learning. “w/o” means “without”. The mean and std of each metric over three random runs are reported (mean±std). All numbers are percentages. **Bold** numbers are superior results.

| Dataset<br>Metric        | DomainNet R→C (easy)             |                                  | DomainNet R→P (medium)           |                                  | DomainNet R→S (hard)             |                                  |
|--------------------------|----------------------------------|----------------------------------|----------------------------------|----------------------------------|----------------------------------|----------------------------------|
|                          | $cov^*   acc \geq 80\% \uparrow$ | $acc   cov^* \geq 80\% \uparrow$ | $cov^*   acc \geq 70\% \uparrow$ | $acc   cov^* \geq 70\% \uparrow$ | $cov^*   acc \geq 70\% \uparrow$ | $acc   cov^* \geq 70\% \uparrow$ |
| SR (w/o active learning) | 21.50±0.0                        | 40.16±0.0                        | 18.16±0.0                        | 34.74±0.0                        | 7.16±0.0                         | 21.24±0.0                        |
| SR+Margin (M=500)        | 25.38±1.1                        | 44.09±0.9                        | 20.94±0.4                        | 36.65±0.1                        | 11.94±0.4                        | 27.35±0.2                        |
| SR+Margin (M=1000)       | 25.87±1.0                        | 44.70±0.7                        | 22.22±0.3                        | 37.91±0.4                        | 12.43±0.4                        | 28.19±0.4                        |
| DE (w/o active learning) | 26.15±0.2                        | 44.51±0.1                        | 22.44±0.2                        | 39.06±0.1                        | 9.90±0.4                         | 25.37±0.0                        |
| DE+Margin (M=500)        | 30.73±1.2                        | 48.85±0.4                        | 25.19±0.3                        | 40.59±0.1                        | 14.63±0.2                        | 31.11±0.5                        |
| DE+Margin (M=1000)       | 33.24±0.2                        | 50.46±0.4                        | 26.60±0.5                        | 41.73±0.3                        | 16.62±0.4                        | 32.30±0.5                        |
| ASPEST (M=500)           | 36.10±0.1                        | 53.22±0.3                        | 29.01±0.1                        | 44.26±0.1                        | 17.43±0.4                        | 34.55±0.1                        |
| ASPEST (M=1000)          | <b>37.24±0.3</b>                 | <b>54.03±0.1</b>                 | <b>31.01±0.3</b>                 | <b>45.31±0.1</b>                 | <b>19.45±0.3</b>                 | <b>35.96±0.3</b>                 |

Table 17: Results on DomainNet R→C, R→P and R→S for studying the effect of combining selective prediction with active learning. “w/o” means “without”. The mean and std of each metric over three random runs are reported (mean±std). All numbers are percentages. **Bold** numbers are superior results.

## 873 G.9 Ensemble accuracy after each round of active learning

874 We evaluate the accuracy of the ensemble model  $f_t$  in the ASPEST algorithm after the  $t$ -th round of ac-  
875 tive learning. Recall that  $f_t$  contains  $N$  models  $f_t^1, \dots, f_t^N$  and  $f_t(\mathbf{x}) = \arg\max_{k \in \mathcal{Y}} \frac{1}{N} \sum_{j=1}^N f_t^j(\mathbf{x} |$   
876  $k)$ . The results in Table 22 show that after each round of active learning, the accuracy of the ensemble  
877 model will be improved significantly.

| Dataset<br>Metric             | MNIST→SVHN     |           | DomainNet R→C (easy) |           |
|-------------------------------|----------------|-----------|----------------------|-----------|
|                               | AUC $\uparrow$ |           | AUC $\uparrow$       |           |
| Labeling Budget               | 100            | 500       | 500                  | 1000      |
| SR+Margin ( $\lambda = 0$ )   | 71.90±3.1      | 90.56±0.8 | 60.05±0.9            | 60.34±1.2 |
| SR+Margin ( $\lambda = 0.5$ ) | 75.54±1.7      | 91.43±0.5 | 64.99±0.7            | 66.81±0.5 |
| SR+Margin ( $\lambda = 1$ )   | 76.79±0.5      | 91.24±0.5 | 64.37±0.8            | 65.91±0.6 |
| SR+Margin ( $\lambda = 2$ )   | 72.71±2.5      | 90.80±0.3 | 64.17±0.3            | 66.21±0.2 |
| DE+Margin ( $\lambda = 0$ )   | 77.12±0.5      | 94.26±0.5 | 66.86±0.5            | 69.29±0.6 |
| DE+Margin ( $\lambda = 0.5$ ) | 79.35±1.4      | 94.22±0.2 | 69.28±0.3            | 71.60±0.2 |
| DE+Margin ( $\lambda = 1$ )   | 78.59±1.4      | 94.31±0.6 | 68.85±0.4            | 71.29±0.3 |
| DE+Margin ( $\lambda = 2$ )   | 77.64±2.3      | 93.81±0.4 | 68.54±0.1            | 71.28±0.2 |
| ASPEST ( $\lambda = 0$ )      | 84.48±2.5      | 96.99±0.2 | 68.61±1.2            | 73.21±1.2 |
| ASPEST ( $\lambda = 0.5$ )    | 86.46±3.1      | 97.01±0.0 | 71.53±0.1            | 73.69±0.1 |
| ASPEST ( $\lambda = 1$ )      | 88.84±1.0      | 96.62±0.2 | 71.61±0.2            | 73.27±0.2 |
| ASPEST ( $\lambda = 2$ )      | 85.46±1.7      | 96.43±0.1 | 70.54±0.3            | 73.02±0.1 |

Table 18: Ablation study results for the effect of using joint training and the effect of the loss coefficient  $\lambda$ . The mean and std of each metric over three random runs are reported (mean±std). All numbers are percentages.

| Dataset          | MNIST→SVHN |           | DomainNet R→C (easy) |           |
|------------------|------------|-----------|----------------------|-----------|
| Metric           | AUC ↑      |           | AUC ↑                |           |
| Labeling Budget  | 100        | 500       | 500                  | 1000      |
| SR+Margin (T=1)  | 63.10±2.7  | 75.42±3.6 | 65.16±0.4            | 66.76±0.3 |
| SR+Margin (T=2)  | 68.09±3.1  | 87.45±1.6 | 64.64±0.8            | 66.91±0.1 |
| SR+Margin (T=5)  | 74.87±1.7  | 91.32±0.5 | 64.35±0.2            | 66.76±0.3 |
| SR+Margin (T=10) | 76.79±0.5  | 91.24±0.5 | 64.37±0.8            | 65.91±0.6 |
| SR+Margin (T=20) | 72.81±1.5  | 90.34±1.3 | 63.65±0.6            | 66.08±0.4 |
| DE+Margin (T=1)  | 69.85±0.5  | 82.74±2.1 | 68.39±0.2            | 70.55±0.0 |
| DE+Margin (T=2)  | 75.25±1.0  | 90.90±1.0 | 68.79±0.2            | 70.95±0.5 |
| DE+Margin (T=5)  | 78.41±0.2  | 93.26±0.3 | 68.80±0.2            | 71.21±0.2 |
| DE+Margin (T=10) | 78.59±1.4  | 94.31±0.6 | 68.85±0.4            | 71.29±0.3 |
| DE+Margin (T=20) | 76.84±0.4  | 94.67±0.2 | 68.50±0.5            | 71.39±0.2 |
| ASPEST (T=1)     | 62.53±1.0  | 80.72±1.5 | 69.44±0.1            | 71.79±0.2 |
| ASPEST (T=2)     | 75.08±1.4  | 89.70±0.7 | 70.68±0.2            | 72.56±0.3 |
| ASPEST (T=5)     | 81.57±1.8  | 95.43±0.1 | 71.23±0.1            | 73.19±0.1 |
| ASPEST (T=10)    | 88.84±1.0  | 96.62±0.2 | 71.61±0.2            | 73.27±0.2 |
| ASPEST (T=20)    | 91.26±0.9  | 97.32±0.1 | 70.57±0.4            | 73.32±0.3 |

Table 19: Ablation study results for the effect of the number of rounds  $T$ . The mean and std of each metric over three random runs are reported (mean±std). All numbers are percentages.

| Dataset         | MNIST→SVHN |           | DomainNet R→C (easy) |           |
|-----------------|------------|-----------|----------------------|-----------|
| Metric          | AUC ↑      |           | AUC ↑                |           |
| Labeling Budget | 100        | 500       | 500                  | 1000      |
| DE+Margin (N=2) | 67.41±3.9  | 91.20±0.8 | 65.82±0.5            | 67.72±0.4 |
| DE+Margin (N=3) | 77.53±1.5  | 93.41±0.1 | 67.54±0.4            | 69.61±0.2 |
| DE+Margin (N=4) | 74.46±2.7  | 93.65±0.3 | 68.09±0.2            | 70.65±0.3 |
| DE+Margin (N=5) | 78.59±1.4  | 94.31±0.6 | 68.85±0.4            | 71.29±0.3 |
| DE+Margin (N=6) | 79.34±0.7  | 94.40±0.1 | 68.63±0.2            | 71.65±0.3 |
| DE+Margin (N=7) | 80.30±1.5  | 93.97±0.2 | 69.41±0.1            | 71.78±0.3 |
| DE+Margin (N=8) | 78.91±1.5  | 94.52±0.2 | 69.00±0.0            | 71.88±0.4 |
| ASPEST (N=2)    | 80.38±1.2  | 96.26±0.0 | 69.14±0.3            | 71.36±0.3 |
| ASPEST (N=3)    | 84.86±1.0  | 96.60±0.2 | 69.91±0.2            | 72.25±0.2 |
| ASPEST (N=4)    | 84.94±0.3  | 96.76±0.1 | 70.68±0.2            | 73.09±0.2 |
| ASPEST (N=5)    | 88.84±1.0  | 96.62±0.2 | 71.61±0.2            | 73.27±0.2 |
| ASPEST (N=6)    | 84.51±0.5  | 96.66±0.2 | 71.20±0.2            | 73.42±0.3 |
| ASPEST (N=7)    | 86.70±2.3  | 96.90±0.2 | 71.16±0.2            | 73.50±0.1 |
| ASPEST (N=8)    | 88.59±0.9  | 97.01±0.1 | 71.62±0.3            | 73.76±0.2 |

Table 20: Ablation study results for the effect of the number of models  $N$  in the ensemble. The mean and std of each metric over three random runs are reported (mean±std). All numbers are percentages.

## 878 G.10 Empirical analysis for checkpoint ensemble

879 In this section, we analyze why the proposed checkpoint ensemble can improve selective prediction  
880 performance. We postulate the rationales: (1) the checkpoint ensemble can help with generalization;  
881 (2) the checkpoint ensemble can help with reducing overconfident wrong predictions.

882 Regarding (1), when fine-tuning the model on the small set of selected labeled test data, we hope that  
883 the fine-tuned model could generalize to remaining unlabeled test data. However, since the selected  
884 test set is small, we might have an overfitting issue. So possibly some intermediate checkpoints  
885 along the training path achieve better generalization than the end checkpoint. By using checkpoint  
886 ensemble, we might get an ensemble that achieves better generalization to remaining unlabeled  
887 test data. Although standard techniques like cross-validation and early stopping can also reduce

| Dataset                    | MNIST→SVHN       |                  | DomainNet R→C (easy) |                  |
|----------------------------|------------------|------------------|----------------------|------------------|
| Metric                     | AUC ↑            |                  | AUC ↑                |                  |
| Labeling Budget            | 100              | 500              | 500                  | 1000             |
| ASPEST without upper bound | 86.95±1.4        | 96.59±0.1        | 71.39±0.1            | <b>73.52±0.2</b> |
| ASPEST                     | <b>88.84±1.0</b> | <b>96.62±0.2</b> | <b>71.61±0.2</b>     | 73.27±0.2        |

Table 21: Ablation study results for the effect of setting an upper bound when constructing the pseudo-labeled set  $R$  in ASPEST. The mean and std of each metric over three random runs are reported (mean±std). All numbers are percentages. **Bold** numbers are superior results.

| Metric          | Ensemble Test Accuracy |       |                      |       |
|-----------------|------------------------|-------|----------------------|-------|
| Dataset         | MNIST→SVHN             |       | DomainNet R→C (easy) |       |
| Labeling Budget | 100                    | 500   | 500                  | 1000  |
| Round 0         | 24.67                  | 24.87 | 37.33                | 37.46 |
| Round 1         | 24.91                  | 43.80 | 39.61                | 39.67 |
| Round 2         | 37.75                  | 54.91 | 41.15                | 41.55 |
| Round 3         | 45.62                  | 64.15 | 41.97                | 43.24 |
| Round 4         | 50.94                  | 71.65 | 42.57                | 45.09 |
| Round 5         | 56.75                  | 77.23 | 43.85                | 45.62 |
| Round 6         | 59.82                  | 79.97 | 44.20                | 46.60 |
| Round 7         | 63.10                  | 81.43 | 45.02                | 47.51 |
| Round 8         | 67.49                  | 82.78 | 45.17                | 48.59 |
| Round 9         | 69.93                  | 84.70 | 45.80                | 48.66 |
| Round 10        | 71.14                  | 85.48 | 46.36                | 49.70 |

Table 22: Ensemble test accuracy of ASPEST after each round of active learning. All numbers are percentages.

overfitting, they are not suitable in the active selective prediction setup since the amount of labeled test data is small.

Regarding (2), when fine-tuning the model on the small set of selected labeled test data, the model can get increasingly confident on the test data. Since there exist high-confidence mis-classified test points, incorporating intermediate checkpoints along the training path into the ensemble can reduce the average confidence of the ensemble on those mis-classified test points. By using checkpoint ensemble, we might get an ensemble that has better confidence estimation for selective prediction on the test data.

We perform experiments on the image dataset MNIST→SVHN and the text dataset Amazon Review to verify these two hypotheses. We employ one-round active learning with a labeling budget of 100 samples. We use the margin sampling method for sample selection and fine-tune a single model on the selected labeled test data for 200 epochs. We first evaluate the median confidence of the model on the correctly classified and mis-classified test data respectively when fine-tuning the model on the selected labeled test data. In Figure 4, we show that during fine-tuning, the model gets increasingly confident not only on the correctly classified test data, but also on the mis-classified test data.

We then evaluate the Accuracy, the area under the receiver operator characteristic curve (AUROC) and the area under the accuracy-coverage curve (AUC) metrics of the checkpoints during fine-tuning and the checkpoint ensemble constructed after fine-tuning on the target test dataset. The AUROC metric is equivalent to the probability that a randomly chosen correctly classified input has a higher confidence score than a randomly chosen mis-classified input. Thus, the AUROC metric can measure the quality of the confidence score for selective prediction. The results in Figure 5 show that in the fine-tuning path, different checkpoints have different target test accuracy and the end checkpoint may not have the optimal target test accuracy. The checkpoint ensemble can have better target test accuracy than the end checkpoint. Also, in the fine-tuning path, different checkpoints have different confidence estimation (the quality of confidence estimation is measured by the metric AUROC) on the target test data and the end checkpoint may not have the optimal confidence estimation. The checkpoint ensemble can have better confidence estimation than the end checkpoint. Furthermore, in the fine-tuning path, different checkpoints have different selective prediction performance (measured by the metric AUC) on the target test data and the end checkpoint may not have the optimal selective



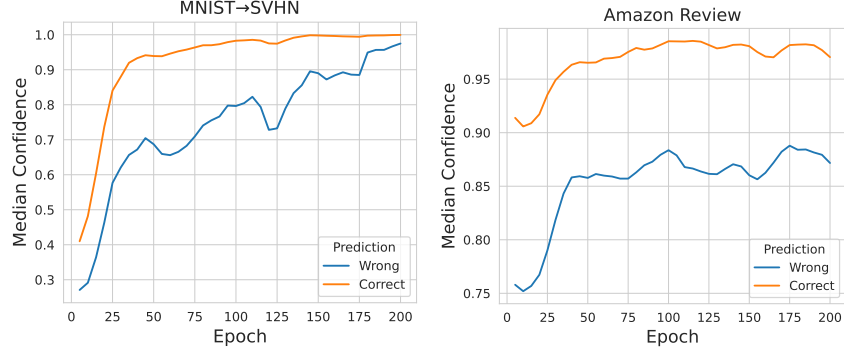

Figure 4: Evaluating the median confidence of the model on the correctly classified and mis-classified test data respectively when fine-tuning the model on the selected labeled test data.

917 prediction performance. The checkpoint ensemble can have better selective prediction performance  
 918 than the end checkpoint.

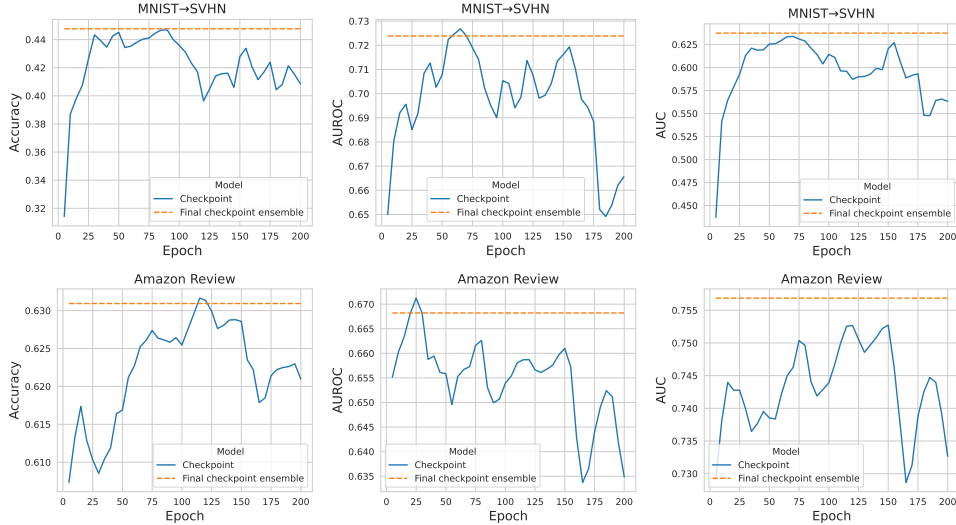

Figure 5: Evaluating the checkpoints during fine-tuning and the checkpoint ensemble constructed after fine-tuning on the target test dataset.

## 919 G.11 Empirical analysis for self-training

920 In this section, we analyze why the proposed self-training can improve selective prediction perfor-  
 921 mance. Our hypothesis is that after fine-tuning the models on the selected labeled test data, the  
 922 checkpoint ensemble constructed is less confident on the test data  $U_X$  compared to the deep ensemble  
 923 (obtained by ensembling the end checkpoints). Thus, using the softmax outputs of the checkpoint  
 924 ensemble as soft pseudo-labels for self-training can alleviate the overconfidence issue and improve  
 925 selective prediction performance.

926 We perform experiments on the image dataset MNIST→SVHN and the text dataset Amazon Review  
 927 to verify this hypothesis. To see the effect of self-training better, we only employ one-round active  
 928 learning (i.e., only apply one-round self-training) with a labeling budget of 100 samples. We visualize  
 929 the histogram of the confidence scores on the test data  $U_X$  for the deep ensemble and the checkpoint  
 930 ensemble after fine-tuning. We also evaluate the receiver operator characteristic curve (AUROC) and  
 931 the area under the accuracy-coverage curve (AUC) metrics of the checkpoint ensemble before and  
 932 after the self-training. We use the AUROC metric to measure the quality of the confidence score for  
 933 selective prediction. The results in Figure 6 show that the checkpoint ensemble is less confident on

the test data  $U_X$  compared to the deep ensemble. On the high-confidence region (i.e., confidence  $\geq \eta$ . Recall that  $\eta$  is the confidence threshold used for constructing the pseudo-labeled set  $R$ . We set  $\eta = 0.9$  in our experiments), the checkpoint ensemble is also less confident than the deep ensemble. Besides, the results in Table 23 show that after self-training, both AUROC and AUC metrics of the checkpoint ensemble are improved significantly. Therefore, the self-training can alleviate the overconfidence issue and improve selective prediction performance.

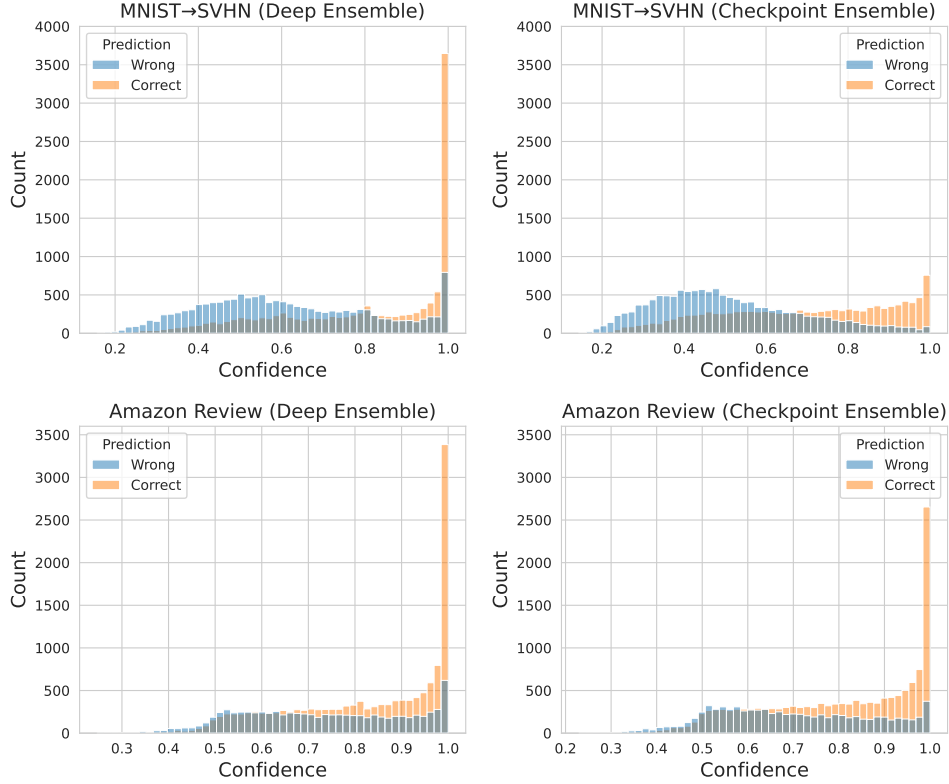

Figure 6: Plot the histogram of the confidence scores on the test data  $U_X$  for the deep ensemble and the checkpoint ensemble after fine-tuning.

| Dataset              | MNIST→SVHN |       | Amazon Review |       |
|----------------------|------------|-------|---------------|-------|
| Metric               | AUROC↑     | AUC↑  | AUROC↑        | AUC↑  |
| Before self-training | 73.92      | 66.75 | 67.44         | 76.24 |
| After self-training  | 74.31      | 67.37 | 67.92         | 76.80 |

Table 23: Evaluating the AUROC and AUC metrics of the checkpoint ensemble before and after self-training. All numbers are percentages.

## 940 G.12 Training with unsupervised domain adaptation

941 In this section, we study whether incorporating Unsupervised Domain Adaptation (UDA) techniques  
 942 into training could improve the selective prediction performance. UDA techniques are mainly  
 943 proposed to adapt the representation learned on the labeled source domain data to the target domain  
 944 with unlabeled data from the target domain [45]. We can easily incorporate those UDA techniques  
 945 into SR (Algorithm 1), DE (Algorithm 2), and the proposed ASPEST (Algorithm 3) by adding  
 946 unsupervised training losses into the training objectives.

947 We consider the method DE with UDA and the method ASPEST with UDA. The algorithm for DE  
 948 with UDA is presented in Algorithm 4 and the algorithm for ASPEST with UDA is presented in  
 949 Algorithm 5. We consider UDA techniques based on representation matching where the goal is

950 to minimize the distance between the distribution of the representation on  $\mathcal{D}^u$  and that on  $U_X$ .  
 951 Suppose the model  $f$  is a composition of a prediction function  $h$  and a representation function  $\phi$  (i.e.,  
 952  $f(x) = h(\phi(x))$ ). Then  $L_{UDA}(\mathcal{D}^u, U_X; \theta) = d(p_{\mathcal{D}^u}^\phi, p_{U_X}^\phi)$ , which is a representation matching loss.  
 953 We consider the representation matching losses from the state-of-the-art UDA methods DANN [18]  
 954 and CDAN [47].

955 We evaluate two instantiations of Algorithm 4 – DE with DANN and DE with CDAN, and two  
 956 instantiations of Algorithm 5 – ASPEST with DANN and ASPEST with CDAN. The values of the  
 957 hyper-parameters are the same as those described in the paper except that we set  $n_s = 20$ . For DANN  
 958 and CDAN, we set the hyper-parameter between the source classifier and the domain discriminator  
 959 to be 0.1. The results are shown in Table 24 (MNIST→SVHN), Table 25 (CIFAR-10→CINIC-10),  
 960 Table 26 (FMoW), Table 27 (Amazon Review), Table 28 (DomainNet R→C), Table 29 (DomainNet  
 961 R→P), Table 30 (DomainNet R→S) and Table 31 (Otto).

962 From the results, we can see that ASPEST outperforms (or on par with) DE with DANN and DE  
 963 with CDAN across different datasets, although ASPEST doesn’t use UDA techniques. We further  
 964 show that by combining ASPEST with UDA, it might achieve even better performance. For example,  
 965 on MNIST→SVHN, ASPEST with DANN improves the mean AUC from 96.62% to 97.03% when  
 966 the labeling budget is 500. However, in some cases, combining ASPEST with DANN or CDAN  
 967 leads to much worse results. For example, on MNIST→SVHN, when the labeling budget is 100,  
 968 combining ASPEST with DANN or CDAN will reduce the mean AUC by over 4%. It might be  
 969 because in those cases, DANN or CDAN fails to align the representations between the source and  
 970 target domains. Existing work also show that UDA methods may not have stable performance across  
 971 different kinds of distribution shifts and sometimes they can even yield accuracy degradation [34, 58].  
 972 So our findings align with those of existing work.

---

**Algorithm 4** DE with Unsupervised Domain Adaptation

---

**Input:** A training dataset  $\mathcal{D}^u$ , An unlabeled test dataset  $U_X$ , the number of rounds  $T$ , the total  
 labeling budget  $M$ , a source-trained model  $\bar{f}$ , an acquisition function  $a(B, f, g)$ , the number of  
 models in the ensemble  $N$ , the number of initial training epochs  $n_s$ , and a hyper-parameter  $\lambda$ .

Let  $f_0^j = \bar{f}$  for  $j = 1, \dots, N$ .

Fine-tune each model  $f_0^j$  in the ensemble via SGD for  $n_s$  training epochs independently using the  
 following training objective with different randomness:

$$\min_{\theta^j} \mathbb{E}_{(\mathbf{x}, y) \in \mathcal{D}^u} \ell_{CE}(\mathbf{x}, y; \theta^j) + L_{UDA}(\mathcal{D}^u, U_X; \theta^j) \quad (37)$$

where  $L_{UDA}$  is a loss function for unsupervised domain adaptation.

Let  $B_0 = \emptyset$ .

Let  $g_t(\mathbf{x}) = \max_{k \in \mathcal{Y}} f_t(\mathbf{x} | k)$ .

**for**  $t = 1, \dots, T$  **do**

    Select a batch  $B_t$  with a size of  $m = \lfloor \frac{M}{T} \rfloor$  from  $U_X$  for labeling via:

$$B_t = \arg \max_{B \subset U_X \setminus (\cup_{l=0}^{t-1} B_l), |B|=m} a(B, f_{t-1}, g_{t-1}) \quad (38)$$

    Use an oracle to assign ground-truth labels to the examples in  $B_t$  to get  $\tilde{B}_t$ .

    Fine-tune each model  $f_{t-1}^j$  in the ensemble via SGD independently using the following training  
 objective with different randomness:

$$\min_{\theta^j} \mathbb{E}_{(\mathbf{x}, y) \in \cup_{l=1}^t \tilde{B}_l} \ell_{CE}(\mathbf{x}, y; \theta^j) + \lambda \cdot \mathbb{E}_{(\mathbf{x}, y) \in \mathcal{D}^u} \ell_{CE}(\mathbf{x}, y; \theta^j) + L_{UDA}(\mathcal{D}^u, U_X; \theta^j) \quad (39)$$

    where  $\theta^j$  is the model parameters of  $f_{t-1}^j$ .

    Let  $f_t^j = f_{t-1}^j$ .

**end for**

**Output:** The classifier  $f = f_T$  and the selection scoring function  $g = \max_{k \in \mathcal{Y}} f(\mathbf{x} | k)$ .

---

---

**Algorithm 5** ASPEST with Unsupervised Domain Adaptation

---

**Input:** A training set  $\mathcal{D}^{tr}$ , a unlabeled test set  $U_X$ , the number of rounds  $T$ , the labeling budget  $M$ , the number of models  $N$ , the number of initial training epochs  $n_s$ , a checkpoint epoch  $c_e$ , a threshold  $\eta$ , a sub-sampling fraction  $p$ , and a hyper-parameter  $\lambda$ .

Let  $f_0^j = \bar{f}$  for  $j = 1, \dots, N$ .

Set  $N_e = 0$  and  $P = \mathbf{0}_{n \times K}$ .

Fine-tune each  $f_0^j$  for  $n_s$  training epochs using the following training objective:

$$\min_{\theta^j} \mathbb{E}_{(\mathbf{x}, y) \in \mathcal{D}^{tr}} \ell_{CE}(\mathbf{x}, y; \theta^j) + L_{UDA}(\mathcal{D}^{tr}, U_X; \theta^j), \quad (40)$$

where  $L_{UDA}$  is a loss function for unsupervised domain adaptation. During fine-tuning, update  $P$  and  $N_e$  using Eq. (6) every  $c_e$  training epochs.

**for**  $t = 1, \dots, T$  **do**

    Select a batch  $B_t$  from  $U_X$  for labeling using the sample selection objective (8).

    Use an oracle to assign ground-truth labels to the examples in  $B_t$  to get  $\tilde{B}_t$ .

    Set  $N_e = 0$  and  $P = \mathbf{0}_{n \times K}$ .

    Fine-tune each  $f_{t-1}^j$  using the following training objective:

$$\min_{\theta^j} \mathbb{E}_{(\mathbf{x}, y) \in \cup_{i=1}^t \tilde{B}_i} \ell_{CE}(\mathbf{x}, y; \theta^j) + \lambda \cdot \mathbb{E}_{(\mathbf{x}, y) \in \mathcal{D}^{tr}} \ell_{CE}(\mathbf{x}, y; \theta^j) + L_{UDA}(\mathcal{D}^{tr}, U_X; \theta^j), \quad (41)$$

During fine-tuning, update  $P$  and  $N_e$  using Eq (6) every  $c_e$  training epochs.

Let  $f_t^j = f_{t-1}^j$ .

Construct the pseudo-labeled set  $R$  via Eq (10) and create  $R_{\text{sub}}$  by randomly sampling up to  $[p \cdot n]$  data points from  $R$ .

Train each  $f_t^j$  further via SGD using the objective (11) and update  $P$  and  $N_e$  using Eq (6) every  $c_e$  training epochs.

**end for**

**Output:** The classifier  $f(\mathbf{x}_i) = \arg\max_{k \in \mathcal{Y}} P_{i,k}$  and the selection scoring function  $g(\mathbf{x}_i) = \max_{k \in \mathcal{Y}} P_{i,k}$ .

---

| Dataset                   | MNIST→SVHN                   |                   |                   |                              |                   |                   |                   |                   |                   |
|---------------------------|------------------------------|-------------------|-------------------|------------------------------|-------------------|-------------------|-------------------|-------------------|-------------------|
| Metric                    | $cov acc \geq 90\% \uparrow$ |                   |                   | $acc cov \geq 90\% \uparrow$ |                   |                   | AUC $\uparrow$    |                   |                   |
| Labeling Budget           | 100                          | 500               | 1000              | 100                          | 500               | 1000              | 100               | 500               | 1000              |
| DE with DANN + Uniform    | 27.27±1.8                    | 72.78±2.0         | 87.05±0.5         | 63.95±1.4                    | 82.99±0.8         | 88.64±0.2         | 80.37±0.7         | 93.25±0.4         | 96.05±0.1         |
| DE with DANN + Entropy    | 11.33±8.2                    | 74.04±2.2         | 91.06±1.4         | 58.28±2.1                    | 83.64±0.9         | 90.41±0.5         | 74.62±1.6         | 93.45±0.5         | 96.47±0.2         |
| DE with DANN + Confidence | 15.68±6.3                    | 76.34±3.1         | 93.96±1.2         | 61.32±3.0                    | 85.02±0.9         | 91.64±0.4         | 76.43±3.0         | 93.85±0.6         | 96.97±0.3         |
| DE with DANN + Margin     | 30.64±2.1                    | 83.44±0.9         | 96.17±0.5         | 66.79±0.9                    | 87.30±0.4         | 92.71±0.2         | 82.14±0.8         | 95.40±0.3         | 97.60±0.1         |
| DE with DANN + Avg-KLD    | 22.30±3.0                    | 78.13±2.1         | 93.42±1.0         | 63.22±2.0                    | 85.40±0.8         | 91.47±0.5         | 78.88±1.6         | 94.25±0.5         | 97.02±0.2         |
| DE with DANN + CLUE       | 16.42±13.6                   | 72.27±2.8         | 86.71±0.4         | 61.79±2.7                    | 82.72±1.1         | 88.46±0.2         | 77.47±3.4         | 93.33±0.5         | 96.21±0.0         |
| DE with DANN + BADGE      | 25.41±10.9                   | 78.83±1.2         | 90.94±1.1         | 63.93±4.4                    | 85.27±0.5         | 90.45±0.5         | 79.82±4.1         | 94.58±0.3         | 96.89±0.1         |
| DE with CDAN + Uniform    | 28.10±4.8                    | 73.15±0.7         | 87.50±0.6         | 63.95±2.7                    | 83.10±0.3         | 88.86±0.3         | 80.28±2.2         | 93.44±0.1         | 96.13±0.2         |
| DE with CDAN + Entropy    | 6.94±9.8                     | 74.38±1.5         | 90.77±1.3         | 59.90±2.3                    | 84.14±0.4         | 90.32±0.6         | 76.04±2.0         | 93.48±0.3         | 96.38±0.2         |
| DE with CDAN + Confidence | 13.47±10.2                   | 75.15±2.8         | 92.77±0.7         | 60.98±2.0                    | 84.62±0.9         | 91.23±0.3         | 76.19±2.8         | 93.62±0.6         | 96.63±0.1         |
| DE with CDAN + Margin     | 22.44±3.3                    | 81.84±2.5         | 96.07±0.2         | 62.89±3.8                    | 86.71±1.0         | 92.64±0.0         | 78.69±2.6         | 94.89±0.5         | 97.57±0.0         |
| DE with CDAN + Avg-KLD    | 20.23±4.1                    | 80.62±1.7         | 93.13±2.5         | 62.23±2.7                    | 86.34±0.6         | 91.30±1.0         | 77.68±2.5         | 94.81±0.4         | 96.97±0.4         |
| DE with CDAN + CLUE       | 7.47±6.4                     | 72.61±2.9         | 87.22±0.2         | 57.82±2.9                    | 82.50±1.3         | 88.62±0.1         | 73.33±2.3         | 93.38±0.7         | 96.31±0.0         |
| DE with CDAN + BADGE      | 26.88±3.5                    | 79.21±0.1         | 92.50±0.7         | 65.69±1.7                    | 85.32±0.1         | 91.18±0.4         | 81.10±1.3         | 94.73±0.1         | 97.17±0.2         |
| ASPEST (ours)             | <b>52.10</b> ±4.0            | 89.22±0.9         | 98.70±0.4         | <b>76.10</b> ±1.5            | 89.62±0.4         | 93.92±0.3         | <b>88.84</b> ±1.0 | 96.62±0.2         | 98.06±0.1         |
| ASPEST with DANN (ours)   | 37.90±2.4                    | <b>91.61</b> ±0.6 | 99.39±0.4         | 69.45±1.7                    | <b>90.70</b> ±0.3 | 94.42±0.4         | 84.55±1.0         | <b>97.03</b> ±0.1 | 98.23±0.1         |
| ASPEST with CDAN (ours)   | 30.97±11.7                   | 91.39±0.6         | <b>99.50</b> ±0.3 | 67.58±3.2                    | 90.60±0.3         | <b>94.46</b> ±0.2 | 82.20±3.3         | 96.95±0.1         | <b>98.26</b> ±0.1 |

Table 24: Results of evaluating DE with UDA and ASPEST with UDA on MNIST→SVHN. The mean and std of each metric over three random runs are reported (mean±std). All numbers are percentages. **Bold** numbers are superior results.

| Dataset                   | CIFAR-10→CINIC-10            |                   |                   |                              |                   |                   |                   |                   |                   |
|---------------------------|------------------------------|-------------------|-------------------|------------------------------|-------------------|-------------------|-------------------|-------------------|-------------------|
| Metric                    | $cov acc \geq 90\% \uparrow$ |                   |                   | $acc cov \geq 90\% \uparrow$ |                   |                   | AUC $\uparrow$    |                   |                   |
| Labeling Budget           | 500                          | 1000              | 2000              | 500                          | 1000              | 2000              | 500               | 1000              | 2000              |
| DE with DANN + Uniform    | 58.85±0.3                    | 59.39±0.2         | 60.04±0.1         | 77.06±0.2                    | 77.33±0.2         | 77.84±0.1         | 90.40±0.1         | 90.60±0.1         | 90.73±0.1         |
| DE with DANN + Entropy    | 59.42±0.4                    | 60.86±0.3         | 64.52±0.3         | 78.14±0.2                    | 79.20±0.1         | 81.31±0.1         | 90.72±0.0         | 91.06±0.1         | 92.02±0.0         |
| DE with DANN + Confidence | 59.44±0.6                    | 61.08±0.3         | 65.12±0.2         | 78.19±0.1                    | 79.38±0.0         | 81.29±0.1         | 90.73±0.1         | 91.26±0.1         | 92.06±0.0         |
| DE with DANN + Margin     | 59.81±0.3                    | 62.26±0.4         | 65.58±0.4         | 78.15±0.0                    | 79.25±0.1         | 81.05±0.1         | 90.76±0.1         | 91.30±0.1         | 92.11±0.0         |
| DE with DANN + Avg-KLD    | 60.50±0.5                    | 62.04±0.1         | 65.08±0.2         | 78.32±0.1                    | 79.31±0.1         | 81.07±0.0         | 90.89±0.1         | 91.34±0.0         | 92.11±0.0         |
| DE with DANN + CLUE       | 60.20±0.5                    | 61.69±0.2         | 64.08±0.2         | 77.84±0.2                    | 78.35±0.2         | 79.38±0.1         | 90.73±0.2         | 91.07±0.1         | 91.63±0.0         |
| DE with DANN + BADGE      | 60.18±0.4                    | 62.15±0.2         | 65.31±0.6         | 77.70±0.1                    | 78.54±0.1         | 79.81±0.2         | 90.72±0.1         | 91.19±0.1         | 91.86±0.1         |
| DE with CDAN + Uniform    | 58.72±0.2                    | 59.49±0.5         | 60.28±0.2         | 77.16±0.0                    | 77.52±0.1         | 77.90±0.1         | 90.45±0.1         | 90.65±0.0         | 90.78±0.1         |
| DE with CDAN + Entropy    | 58.73±0.4                    | 60.82±0.5         | 64.45±0.2         | 77.95±0.1                    | 79.20±0.1         | 81.04±0.1         | 90.57±0.1         | 91.10±0.1         | 91.86±0.1         |
| DE with CDAN + Confidence | 59.10±0.6                    | 61.03±0.6         | 64.60±0.2         | 77.92±0.0                    | 79.26±0.2         | 81.07±0.0         | 90.59±0.0         | 91.10±0.2         | 91.96±0.0         |
| DE with CDAN + Margin     | 59.88±0.5                    | 61.57±0.9         | 64.82±0.4         | 78.09±0.3                    | 79.02±0.2         | 80.82±0.1         | 90.73±0.1         | 91.17±0.2         | 91.98±0.1         |
| DE with CDAN + Avg-KLD    | 60.51±0.1                    | 61.71±0.5         | 65.03±0.3         | 78.20±0.2                    | 79.29±0.2         | 81.15±0.1         | 90.85±0.0         | 91.19±0.1         | 92.07±0.1         |
| DE with CDAN + CLUE       | 60.12±0.5                    | 61.77±0.3         | 64.06±0.2         | 77.88±0.1                    | 78.38±0.2         | 79.42±0.2         | 90.73±0.1         | 91.08±0.1         | 91.64±0.0         |
| DE with CDAN + BADGE      | 60.28±0.7                    | 61.84±0.2         | 65.29±0.3         | 77.68±0.2                    | 78.53±0.1         | 79.84±0.2         | 90.73±0.1         | 91.17±0.0         | 91.95±0.1         |
| ASPEST (ours)             |                              |                   |                   | 78.23±0.1                    | 79.49±0.1         | 81.25±0.1         | 90.95±0.0         | 91.60±0.0         | 92.33±0.1         |
| ASPEST with DANN (ours)   | <b>61.69</b> ±0.2            | <b>63.58</b> ±0.4 | <b>66.81</b> ±0.4 | <b>78.68</b> ±0.1            | <b>79.68</b> ±0.1 | 81.42±0.1         | <b>91.16</b> ±0.1 | <b>91.66</b> ±0.1 | 92.37±0.1         |
| ASPEST with CDAN (ours)   | 61.00±0.2                    | 62.80±0.4         | 66.78±0.1         | 78.56±0.1                    | 79.54±0.1         | <b>81.49</b> ±0.0 | 91.13±0.0         | 91.57±0.1         | <b>92.41</b> ±0.0 |

Table 25: Results of evaluating DE with UDA and ASPEST with UDA on CIFAR-10→CINIC-10. The mean and std of each metric over three random runs are reported (mean±std). All numbers are percentages. **Bold** numbers are superior results.

| Dataset                   | FMoW                         |                   |                   |                              |                   |                   |                   |                   |                   |
|---------------------------|------------------------------|-------------------|-------------------|------------------------------|-------------------|-------------------|-------------------|-------------------|-------------------|
| Metric                    | $cov acc \geq 70\% \uparrow$ |                   |                   | $acc cov \geq 70\% \uparrow$ |                   |                   | AUC $\uparrow$    |                   |                   |
| Labeling Budget           | 500                          | 1000              | 2000              | 500                          | 1000              | 2000              | 500               | 1000              | 2000              |
| DE with DANN + Uniform    | 46.11±0.6                    | 51.77±0.3         | 62.76±0.5         | 57.62±0.3                    | 60.67±0.4         | 66.21±0.2         | 70.17±0.3         | 72.46±0.3         | 76.83±0.2         |
| DE with DANN + Entropy    | 44.36±0.7                    | 48.19±0.3         | 59.52±0.8         | 56.78±0.1                    | 59.51±0.0         | 65.75±0.3         | 69.09±0.2         | 71.02±0.2         | 75.15±0.3         |
| DE with DANN + Confidence | 44.46±0.5                    | 49.32±0.1         | 61.47±0.3         | 57.04±0.3                    | 60.51±0.3         | 66.61±0.1         | 69.14±0.1         | 71.50±0.1         | 75.70±0.1         |
| DE with DANN + Margin     | 48.09±0.4                    | 54.35±0.5         | 70.11±0.4         | 59.07±0.2                    | 62.79±0.2         | 70.02±0.1         | 70.76±0.1         | 73.29±0.2         | 78.25±0.1         |
| DE with DANN + Avg-KLD    | 48.42±0.1                    | 55.95±0.2         | 68.73±1.1         | 59.06±0.2                    | 63.44±0.2         | 69.41±0.5         | 70.84±0.1         | 73.83±0.1         | 77.91±0.4         |
| DE with DANN + CLUE       | 44.14±0.6                    | 46.15±0.2         | 49.02±0.5         | 56.01±0.3                    | 56.89±0.2         | 58.66±0.3         | 69.11±0.2         | 70.16±0.2         | 71.46±0.2         |
| DE with DANN + BADGE      | 48.57±0.5                    | 54.47±0.5         | 67.69±0.9         | 58.61±0.2                    | 61.67±0.0         | 68.71±0.5         | 71.17±0.2         | 73.64±0.1         | 78.65±0.3         |
| DE with CDAN + Uniform    | 46.08±0.7                    | 51.92±0.8         | 62.87±0.2         | 57.45±0.1                    | 60.73±0.4         | 66.19±0.2         | 69.93±0.3         | 72.57±0.4         | 76.87±0.1         |
| DE with CDAN + Entropy    | 44.42±0.3                    | 49.32±0.1         | 60.11±0.3         | 56.83±0.1                    | 60.04±0.2         | 65.95±0.2         | 69.18±0.2         | 71.34±0.3         | 75.44±0.3         |
| DE with CDAN + Confidence | 44.75±0.1                    | 49.34±0.1         | 62.80±1.0         | 57.09±0.1                    | 60.50±0.2         | 66.94±0.4         | 69.27±0.1         | 71.60±0.2         | 76.14±0.3         |
| DE with CDAN + Margin     | 47.48±0.7                    | 54.48±0.7         | 70.25±0.9         | 58.98±0.4                    | 62.98±0.3         | 70.10±0.4         | 70.55±0.3         | 73.46±0.2         | 78.39±0.3         |
| DE with CDAN + Avg-KLD    | 48.43±0.2                    | 54.37±0.4         | 68.93±0.6         | 59.36±0.2                    | 62.71±0.2         | 69.54±0.2         | 71.12±0.2         | 73.35±0.2         | 77.97±0.2         |
| DE with CDAN + CLUE       | 44.09±0.3                    | 46.11±0.5         | 48.90±0.1         | 55.78±0.3                    | 56.98±0.2         | 58.46±0.2         | 69.03±0.1         | 70.02±0.2         | 71.31±0.1         |
| DE with CDAN + BADGE      | 47.93±0.2                    | 54.61±0.2         | 67.01±0.5         | 58.16±0.1                    | 61.81±0.1         | 68.36±0.2         | 70.91±0.2         | 73.63±0.1         | 78.52±0.2         |
| ASPEST (ours)             | <b>53.05</b> ±0.4            | <b>59.86</b> ±0.4 | <b>76.52</b> ±0.6 | 61.18±0.2                    | <b>65.18</b> ±0.2 | <b>72.86</b> ±0.3 | 71.12±0.2         | <b>74.25</b> ±0.2 | <b>79.93</b> ±0.1 |
| ASPEST with DANN (ours)   | 51.02±0.9                    | 58.63±1.1         | 72.97±0.9         | 61.10±0.5                    | 64.98±0.4         | 71.21±0.4         | 71.03±0.3         | 73.79±0.4         | 78.04±0.2         |
| ASPEST with CDAN (ours)   | 51.40±0.6                    | 58.21±0.6         | 73.94±0.6         | <b>61.38</b> ±0.2            | 65.04±0.2         | 71.63±0.2         | <b>71.17</b> ±0.1 | 73.59±0.1         | 78.04±0.2         |

Table 26: Results of evaluating DE with UDA and ASPEST with UDA on FMoW. The mean and std of each metric over three random runs are reported (mean±std). All numbers are percentages. **Bold** numbers are superior results.

| Dataset                   | Amazon Review                |                   |                   |                              |                   |                   |                   |                   |                   |
|---------------------------|------------------------------|-------------------|-------------------|------------------------------|-------------------|-------------------|-------------------|-------------------|-------------------|
| Metric                    | $cov acc \geq 80\% \uparrow$ |                   |                   | $acc cov \geq 80\% \uparrow$ |                   |                   | AUC $\uparrow$    |                   |                   |
| Labeling Budget           | 500                          | 1000              | 2000              | 500                          | 1000              | 2000              | 500               | 1000              | 2000              |
| DE with DANN + Uniform    | 38.55±3.3                    | 37.25±1.8         | 39.21±1.9         | 69.06±0.6                    | 68.94±0.1         | 69.41±0.2         | 77.52±0.7         | 77.03±0.4         | 77.70±0.2         |
| DE with DANN + Entropy    | 38.22±2.3                    | 41.85±0.8         | 41.57±1.3         | 69.48±0.3                    | <b>70.71</b> ±0.3 | 71.55±0.2         | 77.49±0.5         | 78.39±0.2         | 78.58±0.1         |
| DE with DANN + Confidence | 38.01±1.0                    | 38.36±2.5         | 38.89±1.3         | 69.45±0.1                    | 70.16±0.3         | 71.44±0.2         | 77.54±0.2         | 77.58±0.5         | 78.48±0.3         |
| DE with DANN + Margin     | 36.82±1.3                    | 36.89±1.3         | 41.98±1.5         | 69.35±0.3                    | 69.63±0.3         | 71.27±0.2         | 77.30±0.3         | 77.23±0.3         | 78.34±0.3         |
| DE with DANN + Avg-KLD    | 37.15±2.9                    | 38.21±1.3         | 42.46±1.4         | 69.38±0.4                    | 69.79±0.2         | 71.21±0.2         | 77.25±0.6         | 77.72±0.3         | 78.68±0.3         |
| DE with DANN + CLUE       | <b>40.23</b> ±4.0            | 34.71±1.8         | 31.38±0.9         | 68.95±0.7                    | 68.07±0.2         | 67.44±0.3         | 77.62±1.0         | 76.27±0.6         | 75.60±0.2         |
| DE with DANN + BADGE      | 37.51±1.8                    | 37.00±0.9         | 41.62±2.3         | 68.98±0.4                    | 69.27±0.1         | 70.20±0.4         | 77.20±0.4         | 77.21±0.1         | 78.31±0.5         |
| DE with CDAN + Uniform    | 37.81±0.3                    | 37.83±2.7         | 39.52±0.8         | 68.93±0.1                    | 69.16±0.7         | 69.50±0.3         | 77.16±0.1         | 77.30±0.7         | 77.74±0.3         |
| DE with CDAN + Entropy    | 37.99±0.8                    | 37.68±1.1         | 42.55±0.9         | <b>69.54</b> ±0.3            | 70.01±0.2         | 71.52±0.2         | 77.52±0.2         | 77.61±0.1         | 78.63±0.1         |
| DE with CDAN + Confidence | 35.76±0.9                    | 38.69±2.8         | 41.43±2.1         | 69.24±0.0                    | 70.45±0.4         | 71.50±0.4         | 77.08±0.2         | 77.82±0.4         | 78.47±0.3         |
| DE with CDAN + Margin     | 37.68±2.9                    | 37.43±1.0         | 42.18±1.3         | 69.50±0.3                    | 69.80±0.4         | 71.29±0.0         | 77.50±0.5         | 77.31±0.3         | 78.46±0.3         |
| DE with CDAN + Avg-KLD    | 37.85±1.6                    | 40.71±0.9         | 44.35±0.9         | 69.41±0.3                    | 70.29±0.1         | 71.28±0.2         | 77.28±0.5         | 78.11±0.2         | 78.86±0.2         |
| DE with CDAN + CLUE       | 34.85±2.7                    | 34.03±1.3         | 30.70±0.4         | 68.70±0.3                    | 67.84±0.1         | 67.12±0.3         | 76.95±0.7         | 76.23±0.4         | 75.36±0.4         |
| DE with CDAN + BADGE      | 39.47±0.2                    | 39.29±1.1         | 41.64±0.9         | 69.33±0.0                    | 69.34±0.2         | 70.58±0.2         | 77.52±0.2         | 77.49±0.2         | 78.24±0.3         |
| ASPEST (ours)             | 38.44±0.7                    | 40.96±0.8         | 45.77±0.1         | 69.31±0.3                    | 70.17±0.2         | <b>71.60</b> ±0.2 | 77.69±0.1         | 78.35±0.2         | <b>79.51</b> ±0.2 |
| ASPEST with DANN (ours)   | 40.22±0.5                    | 41.99±1.4         | <b>45.84</b> ±0.1 | 69.42±0.1                    | 70.30±0.1         | 71.58±0.2         | <b>78.00</b> ±0.1 | 78.34±0.3         | 79.43±0.1         |
| ASPEST with CDAN (ours)   | 40.02±0.5                    | <b>42.46</b> ±0.6 | 44.95±0.4         | 69.50±0.1                    | 70.37±0.2         | 71.42±0.0         | 77.80±0.1         | <b>78.57</b> ±0.1 | 79.25±0.0         |

Table 27: Results of evaluating DE with UDA and ASPEST with UDA on Amazon Review. The mean and std of each metric over three random runs are reported (mean±std). All numbers are percentages. **Bold** numbers are superior results.

| Dataset                   | DomainNet R→C (easy)         |                   |                   |                              |                   |                   |                   |                   |                   |
|---------------------------|------------------------------|-------------------|-------------------|------------------------------|-------------------|-------------------|-------------------|-------------------|-------------------|
| Metric                    | $cov acc \geq 80\% \uparrow$ |                   |                   | $acc cov \geq 80\% \uparrow$ |                   |                   | AUC $\uparrow$    |                   |                   |
| Labeling Budget           | 500                          | 1000              | 2000              | 500                          | 1000              | 2000              | 500               | 1000              | 2000              |
| DE with DANN + Uniform    | 33.53±0.5                    | 36.28±0.3         | 40.13±1.0         | 50.57±0.5                    | 52.19±0.1         | 55.15±0.1         | 69.34±0.3         | 70.98±0.2         | 73.50±0.3         |
| DE with DANN + Entropy    | 28.66±1.0                    | 34.47±0.1         | 42.77±0.7         | 48.13±0.6                    | 52.70±0.3         | 59.01±0.2         | 66.60±0.5         | 70.64±0.1         | 75.45±0.2         |
| DE with DANN + Confidence | 29.92±0.4                    | 35.29±1.0         | 43.33±0.4         | 48.61±0.1                    | 53.36±0.5         | 59.72±0.3         | 67.23±0.2         | 70.92±0.5         | 75.89±0.3         |
| DE with DANN + Margin     | 35.19±0.3                    | 39.63±0.2         | 46.51±0.5         | 52.29±0.3                    | 55.60±0.2         | 60.97±0.4         | 70.70±0.1         | 73.41±0.1         | 77.24±0.3         |
| DE with DANN + Avg-KLD    | 36.02±0.6                    | 39.67±0.5         | 47.20±0.8         | 53.00±0.3                    | 55.75±0.3         | 61.22±0.3         | 71.19±0.3         | 73.51±0.2         | 77.46±0.2         |
| DE with DANN + CLUE       | 32.26±1.5                    | 35.09±0.4         | 35.66±0.3         | 50.21±0.0                    | 50.90±0.1         | 51.50±0.1         | 69.17±0.2         | 70.20±0.2         | 70.82±0.1         |
| DE with DANN + BADGE      | 35.27±0.5                    | 38.88±0.3         | 45.97±0.7         | 52.15±0.3                    | 54.89±0.1         | 60.03±0.3         | 70.65±0.1         | 72.95±0.1         | 76.87±0.1         |
| DE with CDAN + Uniform    | 33.49±0.6                    | 36.01±0.7         | 39.93±0.2         | 50.46±0.2                    | 51.89±0.1         | 55.23±0.2         | 69.32±0.3         | 70.86±0.3         | 73.55±0.2         |
| DE with CDAN + Entropy    | 29.50±0.5                    | 33.86±0.3         | 42.24±0.5         | 48.01±0.1                    | 52.52±0.3         | 58.96±0.2         | 66.82±0.2         | 70.28±0.1         | 75.33±0.1         |
| DE with CDAN + Confidence | 29.21±1.0                    | 34.92±0.6         | 43.36±0.4         | 48.48±0.4                    | 52.85±0.4         | 59.88±0.4         | 66.82±0.5         | 70.61±0.4         | 75.93±0.3         |
| DE with CDAN + Margin     | 35.87±0.7                    | 38.37±0.4         | 46.42±0.6         | 52.58±0.1                    | 55.28±0.2         | 61.20±0.2         | 70.95±0.2         | 72.95±0.2         | 77.26±0.1         |
| DE with CDAN + Avg-KLD    | 36.21±0.6                    | 40.08±0.3         | 47.62±0.4         | 52.95±0.3                    | 55.93±0.1         | 61.56±0.2         | 71.29±0.3         | 73.60±0.1         | 77.58±0.2         |
| DE with CDAN + CLUE       | 31.74±2.1                    | 35.11±0.2         | 35.87±0.5         | 49.99±0.2                    | 51.39±0.2         | 51.43±0.2         | 69.04±0.3         | 70.35±0.0         | 70.82±0.3         |
| DE with CDAN + BADGE      | 34.74±0.5                    | 38.68±0.7         | 45.87±1.0         | 51.80±0.3                    | 54.75±0.2         | 60.22±0.1         | 70.38±0.1         | 72.90±0.2         | 76.85±0.2         |
| ASPEST (ours)             | 37.38±0.1                    | 39.98±0.3         | 48.29±1.0         | 54.56±0.3                    | 56.95±0.1         | 62.69±0.2         | 71.61±0.2         | 73.27±0.2         | 77.40±0.4         |
| ASPEST with DANN (ours)   | <b>37.41</b> ±0.8            | 42.45±1.0         | 49.74±0.6         | <b>55.60</b> ±0.1            | 58.29±0.2         | 63.64±0.2         | 71.88±0.2         | 74.18±0.4         | 78.09±0.0         |
| ASPEST with CDAN (ours)   | 36.60±1.2                    | <b>42.96</b> ±0.6 | <b>50.86</b> ±0.2 | 55.55±0.2                    | <b>58.71</b> ±0.2 | <b>63.85</b> ±0.2 | <b>71.99</b> ±0.2 | <b>74.60</b> ±0.2 | <b>78.45</b> ±0.3 |

Table 28: Results of evaluating DE with UDA and ASPEST with UDA on DomainNet R→C. The mean and std of each metric over three random runs are reported (mean±std). All numbers are percentages. **Bold** numbers are superior results.

| Dataset                   | DomainNet R→P (medium)       |                   |                   |                              |                   |                   |                   |                   |                   |
|---------------------------|------------------------------|-------------------|-------------------|------------------------------|-------------------|-------------------|-------------------|-------------------|-------------------|
| Metric                    | $cov acc \geq 70\% \uparrow$ |                   |                   | $acc cov \geq 70\% \uparrow$ |                   |                   | AUC $\uparrow$    |                   |                   |
| Labeling Budget           | 500                          | 1000              | 2000              | 500                          | 1000              | 2000              | 500               | 1000              | 2000              |
| DE with DANN + Uniform    | 26.98±0.1                    | 28.34±0.5         | 30.63±0.2         | 41.96±0.2                    | 42.89±0.2         | 44.73±0.1         | 57.04±0.1         | 58.10±0.2         | 59.87±0.1         |
| DE with DANN + Entropy    | 24.75±0.4                    | 27.02±0.5         | 30.10±0.2         | 40.29±0.4                    | 42.34±0.2         | 45.78±0.2         | 55.19±0.3         | 57.12±0.3         | 60.21±0.1         |
| DE with DANN + Confidence | 22.41±0.9                    | 27.03±0.6         | 31.70±0.6         | 39.05±0.5                    | 42.61±0.2         | 46.60±0.2         | 53.66±0.6         | 57.35±0.3         | 60.93±0.4         |
| DE with DANN + Margin     | 29.16±0.1                    | 30.58±0.3         | 33.64±0.6         | 43.78±0.2                    | 45.17±0.2         | 47.69±0.4         | 58.76±0.1         | 59.94±0.0         | 62.19±0.4         |
| DE with DANN + Avg-KLD    | 29.52±0.1                    | 31.17±0.4         | 34.09±0.3         | 43.84±0.3                    | 45.33±0.2         | 48.18±0.2         | 58.89±0.2         | 60.25±0.2         | 62.54±0.2         |
| DE with DANN + CLUE       | 27.48±0.5                    | 27.83±0.2         | 28.39±0.5         | 42.05±0.3                    | 42.34±0.2         | 42.65±0.1         | 57.32±0.3         | 57.64±0.2         | 57.99±0.2         |
| DE with DANN + BADGE      | 28.92±0.1                    | 30.36±0.2         | 33.86±0.3         | 43.38±0.1                    | 44.85±0.1         | 47.64±0.3         | 58.38±0.0         | 59.82±0.1         | 62.26±0.2         |
| DE with CDAN + Uniform    | 26.96±0.4                    | 28.33±0.2         | 29.98±0.4         | 41.77±0.3                    | 42.85±0.2         | 44.23±0.4         | 56.86±0.4         | 58.01±0.0         | 59.42±0.4         |
| DE with CDAN + Entropy    | 24.91±0.4                    | 26.30±0.9         | 30.33±0.4         | 40.34±0.3                    | 42.07±0.6         | 45.79±0.2         | 55.38±0.4         | 56.70±0.8         | 60.23±0.2         |
| DE with CDAN + Confidence | 24.58±0.7                    | 27.11±0.5         | 31.07±0.5         | 40.32±0.2                    | 42.64±0.3         | 46.25±0.3         | 55.14±0.3         | 57.40±0.3         | 60.63±0.3         |
| DE with CDAN + Margin     | 28.33±0.1                    | 30.17±0.3         | 33.54±0.4         | 43.44±0.4                    | 44.77±0.1         | 47.56±0.2         | 58.31±0.2         | 59.65±0.1         | 62.17±0.2         |
| DE with CDAN + Avg-KLD    | 28.69±0.2                    | 30.99±0.9         | 34.30±0.2         | 43.64±0.2                    | 45.34±0.2         | 48.22±0.1         | 58.60±0.1         | 60.15±0.4         | 62.67±0.1         |
| DE with CDAN + CLUE       | 27.52±0.6                    | 27.96±0.2         | 28.18±0.5         | 42.02±0.2                    | 42.44±0.1         | 42.67±0.2         | 57.21±0.3         | 57.70±0.1         | 58.04±0.3         |
| DE with CDAN + BADGE      | 28.79±0.1                    | 30.28±0.1         | 33.77±0.4         | 43.45±0.0                    | 44.73±0.3         | 47.84±0.2         | 58.47±0.1         | 59.64±0.2         | 62.37±0.2         |
| ASPEST (ours)             | 29.69±0.1                    | 32.50±0.3         | 35.46±0.6         | 44.96±0.1                    | 46.77±0.2         | 49.42±0.1         | 58.74±0.0         | 60.36±0.0         | 62.84±0.2         |
| ASPEST with DANN (ours)   | <b>31.75</b> ±0.4            | <b>33.58</b> ±0.3 | 36.96±0.2         | <b>46.16</b> ±0.1            | 47.64±0.2         | <b>50.37</b> ±0.3 | <b>59.63</b> ±0.2 | 61.06±0.1         | <b>63.75</b> ±0.1 |
| ASPEST with CDAN (ours)   | 30.39±0.4                    | 33.57±0.3         | <b>37.53</b> ±0.7 | 45.90±0.1                    | <b>47.71</b> ±0.2 | 50.31±0.2         | 59.13±0.3         | <b>61.17</b> ±0.2 | 63.69±0.3         |

Table 29: Results of evaluating DE with UDA and ASPEST with UDA on DomainNet R→P. The mean and std of each metric over three random runs are reported (mean±std). All numbers are percentages. **Bold** numbers are superior results.

| Dataset                   | DomainNet R→S (hard)         |                   |                   |                              |                   |                   |                   |                   |                   |
|---------------------------|------------------------------|-------------------|-------------------|------------------------------|-------------------|-------------------|-------------------|-------------------|-------------------|
| Metric                    | $cov acc \geq 70\% \uparrow$ |                   |                   | $acc cov \geq 70\% \uparrow$ |                   |                   | AUC $\uparrow$    |                   |                   |
| Labeling Budget           | 500                          | 1000              | 2000              | 500                          | 1000              | 2000              | 500               | 1000              | 2000              |
| DE with DANN + Uniform    | 17.55±0.4                    | 19.82±0.3         | 23.57±0.4         | 32.61±0.5                    | 34.56±0.3         | 37.73±0.2         | 47.60±0.5         | 49.92±0.4         | 53.52±0.1         |
| DE with DANN + Entropy    | 10.77±0.8                    | 15.38±0.5         | 20.11±0.5         | 27.78±0.7                    | 31.09±0.2         | 36.39±0.3         | 41.69±0.7         | 45.62±0.3         | 51.05±0.4         |
| DE with DANN + Confidence | 10.64±1.2                    | 15.22±0.4         | 20.25±0.5         | 28.09±1.0                    | 31.76±0.3         | 36.86±0.8         | 41.94±1.3         | 46.19±0.3         | 51.48±0.7         |
| DE with DANN + Margin     | 17.90±0.7                    | 20.44±0.6         | 25.52±0.4         | 33.61±0.1                    | 35.79±0.5         | 40.29±0.3         | 48.67±0.1         | 51.03±0.6         | 55.64±0.4         |
| DE with DANN + Avg-KLD    | 18.02±1.0                    | 21.22±0.2         | 25.46±0.2         | 34.00±0.2                    | 36.51±0.2         | 40.72±0.2         | 49.05±0.2         | 51.79±0.2         | 55.95±0.2         |
| DE with DANN + CLUE       | 15.77±0.3                    | 18.14±0.7         | 19.49±0.4         | 32.10±0.1                    | 33.42±0.3         | 34.50±0.3         | 47.18±0.2         | 48.63±0.3         | 50.03±0.3         |
| DE with DANN + BADGE      | 16.84±0.9                    | 20.88±0.3         | 25.11±0.3         | 33.97±0.1                    | 36.20±0.2         | 40.01±0.3         | 48.87±0.2         | 51.46±0.2         | 55.33±0.2         |
| DE with CDAN + Uniform    | 17.33±0.5                    | 19.79±0.1         | 22.99±0.5         | 32.47±0.5                    | 34.59±0.3         | 37.88±0.2         | 47.49±0.5         | 50.02±0.2         | 53.51±0.3         |
| DE with CDAN + Entropy    | 12.48±0.8                    | 15.19±0.8         | 20.23±0.0         | 28.83±0.1                    | 32.41±0.4         | 36.57±0.1         | 42.93±0.5         | 47.00±0.3         | 51.24±0.2         |
| DE with CDAN + Confidence | 11.23±0.6                    | 13.93±0.1         | 18.45±1.3         | 28.67±0.3                    | 31.35±0.4         | 35.56±0.8         | 42.87±0.5         | 45.40±0.7         | 49.80±1.0         |
| DE with CDAN + Margin     | 18.06±0.7                    | 20.39±0.3         | 25.05±0.3         | 33.98±0.2                    | 35.76±0.2         | 40.11±0.1         | 49.15±0.1         | 50.92±0.1         | 55.27±0.1         |
| DE with CDAN + Avg-KLD    | 18.63±1.0                    | 20.80±0.3         | 25.49±0.9         | 34.19±0.4                    | 36.41±0.2         | 40.53±0.5         | 49.45±0.5         | 51.58±0.1         | 55.74±0.5         |
| DE with CDAN + CLUE       | 16.51±0.3                    | 18.82±0.1         | 19.47±0.1         | 32.23±0.2                    | 33.83±0.4         | 34.72±0.3         | 47.40±0.2         | 49.11±0.2         | 49.98±0.3         |
| DE with CDAN + BADGE      | 17.52±0.8                    | 21.48±0.5         | 25.35±0.4         | 33.53±0.5                    | 36.19±0.4         | 40.31±0.3         | 48.67±0.5         | 51.65±0.3         | 55.62±0.3         |
| ASPEST (ours)             | 17.86±0.4                    | 20.42±0.4         | 25.87±0.4         | 35.17±0.1                    | 37.28±0.3         | 41.46±0.2         | 49.62±0.1         | 51.61±0.4         | 55.90±0.2         |
| ASPEST with DANN (ours)   | 16.35±1.2                    | <b>23.18</b> ±0.4 | 28.00±0.1         | 36.56±0.2                    | <b>39.40</b> ±0.4 | 42.94±0.1         | 50.58±0.4         | <b>53.73</b> ±0.3 | 57.25±0.1         |
| ASPEST with CDAN (ours)   | <b>18.81</b> ±1.1            | 22.95±0.8         | <b>28.17</b> ±0.2 | <b>36.85</b> ±0.3            | 39.10±0.2         | <b>43.25</b> ±0.3 | <b>51.14</b> ±0.3 | 53.47±0.2         | <b>57.26</b> ±0.2 |

Table 30: Results of evaluating DE with UDA and ASPEST with UDA on DomainNet R→S. The mean and std of each metric over three random runs are reported (mean±std). All numbers are percentages. **Bold** numbers are superior results.

| Dataset                   | Otto                         |                        |                        |                              |                        |                        |                        |                        |                        |
|---------------------------|------------------------------|------------------------|------------------------|------------------------------|------------------------|------------------------|------------------------|------------------------|------------------------|
| Metric                    | $cov acc \geq 80\% \uparrow$ |                        |                        | $acc cov \geq 80\% \uparrow$ |                        |                        | AUC $\uparrow$         |                        |                        |
| Labeling Budget           | 500                          | 1000                   | 2000                   | 500                          | 1000                   | 2000                   | 500                    | 1000                   | 2000                   |
| DE with DANN + Uniform    | 70.35 $\pm$ 0.5              | 72.42 $\pm$ 0.4        | 75.63 $\pm$ 0.7        | 76.12 $\pm$ 0.3              | 77.04 $\pm$ 0.1        | 78.25 $\pm$ 0.1        | 86.67 $\pm$ 0.1        | 87.16 $\pm$ 0.1        | 88.09 $\pm$ 0.1        |
| DE with DANN + Entropy    | 75.27 $\pm$ 0.3              | 81.25 $\pm$ 0.1        | 92.23 $\pm$ 0.3        | 78.14 $\pm$ 0.1              | 80.45 $\pm$ 0.0        | 83.73 $\pm$ 0.1        | 87.73 $\pm$ 0.1        | 88.91 $\pm$ 0.0        | 90.90 $\pm$ 0.1        |
| DE with DANN + Confidence | 74.66 $\pm$ 0.3              | 81.62 $\pm$ 0.1        | 92.57 $\pm$ 0.6        | 78.05 $\pm$ 0.2              | 80.50 $\pm$ 0.0        | 83.67 $\pm$ 0.2        | 87.51 $\pm$ 0.1        | 89.06 $\pm$ 0.1        | 90.94 $\pm$ 0.1        |
| DE with DANN + Margin     | 75.47 $\pm$ 0.4              | 82.56 $\pm$ 0.7        | 91.86 $\pm$ 0.9        | 78.26 $\pm$ 0.1              | 80.79 $\pm$ 0.2        | 83.61 $\pm$ 0.3        | 87.87 $\pm$ 0.1        | 89.08 $\pm$ 0.0        | 90.88 $\pm$ 0.1        |
| DE with DANN + Avg-KLD    | 76.02 $\pm$ 0.6              | 81.78 $\pm$ 0.4        | 91.82 $\pm$ 0.3        | 78.53 $\pm$ 0.0              | 80.70 $\pm$ 0.1        | 83.88 $\pm$ 0.0        | 87.99 $\pm$ 0.0        | 89.17 $\pm$ 0.0        | 90.90 $\pm$ 0.1        |
| DE with DANN + CLUE       | 69.68 $\pm$ 0.4              | 68.07 $\pm$ 0.3        | 62.70 $\pm$ 0.6        | 75.81 $\pm$ 0.3              | 75.44 $\pm$ 0.0        | 73.49 $\pm$ 0.3        | 86.68 $\pm$ 0.2        | 86.31 $\pm$ 0.1        | 84.89 $\pm$ 0.2        |
| DE with DANN + BADGE      | 74.69 $\pm$ 0.5              | 79.04 $\pm$ 0.6        | 87.63 $\pm$ 0.4        | 77.97 $\pm$ 0.1              | 79.57 $\pm$ 0.3        | 82.99 $\pm$ 0.1        | 87.82 $\pm$ 0.1        | 88.92 $\pm$ 0.1        | 90.67 $\pm$ 0.1        |
| DE with CDAN + Uniform    | 70.25 $\pm$ 0.9              | 72.43 $\pm$ 0.4        | 75.21 $\pm$ 0.7        | 76.09 $\pm$ 0.3              | 76.94 $\pm$ 0.1        | 78.13 $\pm$ 0.1        | 86.56 $\pm$ 0.3        | 87.14 $\pm$ 0.2        | 87.90 $\pm$ 0.1        |
| DE with CDAN + Entropy    | 74.73 $\pm$ 0.6              | 81.60 $\pm$ 0.8        | 92.58 $\pm$ 0.2        | 77.97 $\pm$ 0.2              | 80.59 $\pm$ 0.3        | 83.81 $\pm$ 0.2        | 87.47 $\pm$ 0.1        | 88.93 $\pm$ 0.1        | 90.84 $\pm$ 0.1        |
| DE with CDAN + Confidence | 74.88 $\pm$ 0.6              | 81.30 $\pm$ 0.8        | 92.53 $\pm$ 0.9        | 78.06 $\pm$ 0.2              | 80.51 $\pm$ 0.3        | 83.85 $\pm$ 0.3        | 87.43 $\pm$ 0.2        | 88.99 $\pm$ 0.1        | 90.95 $\pm$ 0.1        |
| DE with CDAN + Margin     | 76.68 $\pm$ 1.0              | 81.57 $\pm$ 0.4        | 92.20 $\pm$ 0.5        | 78.74 $\pm$ 0.5              | 80.62 $\pm$ 0.2        | 84.01 $\pm$ 0.2        | 88.08 $\pm$ 0.2        | 88.85 $\pm$ 0.2        | 91.09 $\pm$ 0.0        |
| DE with CDAN + Avg-KLD    | 75.88 $\pm$ 0.4              | 81.82 $\pm$ 0.8        | 91.43 $\pm$ 1.1        | 78.45 $\pm$ 0.1              | 80.72 $\pm$ 0.3        | 83.72 $\pm$ 0.3        | 87.92 $\pm$ 0.2        | 89.12 $\pm$ 0.2        | 90.91 $\pm$ 0.2        |
| DE with CDAN + CLUE       | 69.86 $\pm$ 0.5              | 67.79 $\pm$ 0.2        | 63.46 $\pm$ 0.9        | 76.09 $\pm$ 0.2              | 75.42 $\pm$ 0.3        | 73.66 $\pm$ 0.3        | 86.81 $\pm$ 0.1        | 86.25 $\pm$ 0.1        | 85.00 $\pm$ 0.1        |
| DE with CDAN + BADGE      | 74.68 $\pm$ 0.4              | 79.46 $\pm$ 0.3        | 87.57 $\pm$ 0.4        | 77.89 $\pm$ 0.1              | 79.78 $\pm$ 0.1        | 82.85 $\pm$ 0.1        | 87.78 $\pm$ 0.1        | 88.90 $\pm$ 0.1        | 90.72 $\pm$ 0.1        |
| ASPEST (ours)             | 77.85 $\pm$ 0.2              | <b>84.20</b> $\pm$ 0.6 | 94.26 $\pm$ 0.6        | 79.28 $\pm$ 0.1              | <b>81.40</b> $\pm$ 0.1 | 84.62 $\pm$ 0.1        | 88.28 $\pm$ 0.1        | <b>89.61</b> $\pm$ 0.1 | <b>91.49</b> $\pm$ 0.0 |
| ASPEST with DANN (ours)   | <b>78.14</b> $\pm$ 0.4       | 83.33 $\pm$ 0.5        | 93.61 $\pm$ 0.0        | <b>79.33</b> $\pm$ 0.1       | 81.23 $\pm$ 0.1        | 84.21 $\pm$ 0.1        | <b>88.36</b> $\pm$ 0.2 | 89.32 $\pm$ 0.1        | 91.26 $\pm$ 0.0        |
| ASPEST with CDAN (ours)   | 77.75 $\pm$ 0.3              | 83.68 $\pm$ 0.5        | <b>94.44</b> $\pm$ 0.3 | 79.27 $\pm$ 0.0              | 81.30 $\pm$ 0.2        | <b>84.76</b> $\pm$ 0.1 | 88.35 $\pm$ 0.1        | 89.59 $\pm$ 0.0        | 91.41 $\pm$ 0.0        |

Table 31: Results of evaluating DE with UDA and ASPEST with UDA on Otto. The mean and std of each metric over three random runs are reported (mean $\pm$ std). All numbers are percentages. **Bold** numbers are superior results.
